# The Epidemiological and Economic Burden of Diabetes in Ghana: A Scoping Review to Inform Health Technology Assessment

Mohamed Gad<sup>1</sup> $\Omega$ , Joseph Kazibwe<sup>1</sup> $\Omega$ , Emmanuella Abassah-Konadu<sup>2</sup>, Ivy Amankwah<sup>2</sup>, Richmond Owusu<sup>3</sup>, Godwin Gulbi<sup>3</sup>, Sergio Torres-Rueda<sup>1</sup>, Brian Asare<sup>2</sup>, Anna Vassall<sup>1</sup>, Francis Ruiz<sup>1</sup>

## Affiliations

1. Department of Global Health and Development, London School of Hygiene and Tropical Medicine (LSHTM), London, United Kingdom
2. Pharmacy Directorate, Ministry of Health, Accra, Ghana
3. School of Public Health, University of Ghana, Accra, Ghana

$\Omega$ - Joint first authors

Corresponding author:

Joseph Kazibwe  
Global Health and Development  
London School of Hygiene and Tropical Medicine  
Joseph.kazibwe@lshtm.ac.uk

**Keywords:** Diabetes, Burden, Comorbidities, Ghana, Health Technology Assessment

NOTE: This preprint reports new research that has not been certified by peer review and should not be used to guide clinical practice.

49  
50  
51

## **Abstract**

### ***Introduction***

52  
53 Diabetes remains one of the four major causes of morbidity and mortality globally  
54 among non-communicable diseases (NCDs). It is predicted to increase in sub-Saharan  
55 Africa by over 50% by 2045. The aim of this study is to identify, map and estimate the  
56 burden of diabetes in Ghana, which is essential for optimising NCD country policy and  
57 understanding existing knowledge gaps to guide future research in this area.

58

### ***Methods***

59  
60 We followed the Arksey and O'Malley framework for scoping reviews. We searched  
61 electronic databases including Medline, Embase, Web of Science, Scopus, Cochrane  
62 and African Index Medicus following a systematic search strategy. The Preferred  
63 Reporting Items for Systematic Reviews and Meta-Analyses Extension for Scoping  
64 Reviews was followed when reporting the results.

65

### ***Results***

66  
67 A total of 36 studies were found to fulfil the inclusion criteria. The reported prevalence  
68 of diabetes at national level in Ghana ranged between 2.80% – 3.95%. At the regional  
69 level, the Western region reported the highest prevalence of diabetes: 39.80%,  
70 followed by Ashanti region (25.20%) and Central region at 24.60%. The prevalence of  
71 diabetes was generally higher in women in comparison to men. Urban areas were  
72 found to have a higher prevalence of diabetes than rural areas. The mean annual  
73 financial cost of managing one diabetic case at the outpatient clinic was estimated at

74 GHS 540.35 (2021 US \$194.09). There was a paucity of evidence on the overall  
75 economic burden and the regional prevalence burden.

76

77 ***Conclusion***

78 Ghana is faced with a considerable burden of diabetes which varies by region and  
79 setting (urban/rural). There is an urgent need for effective and efficient interventions  
80 to prevent the anticipated elevation in burden of disease through the utilisation of  
81 existing evidence and proven priority-setting tools like Health Technology Assessment  
82 (HTA).

83

84

85

86

## 87 Introduction

88 Diabetes is one of the top four non-communicable diseases (NCDs) in terms of  
89 mortality globally<sup>1</sup>. Approximately 537 million people between the ages of 20-79 years  
90 are living with diabetes globally of which over 75% live in low- and middle-income  
91 countries (LMICs). Of those living with diabetes nearly half are unaware of their  
92 diagnosis<sup>2</sup>. Diabetes exerts tremendous pressure on the resources available for  
93 health; treatment and management of diabetes account for over 10% of the total health  
94 expenditure among adults globally<sup>3</sup>. The prevalence of diabetes is expected to  
95 increase globally to 783 million by 2045<sup>2</sup>.

96

97

98 As of 2021, there were approximately 24 million people with diabetes in sub-Saharan  
99 Africa (SSA) and the number is projected to increase by 134% by 2045. <sup>3</sup>. The  
100 prevalence of diabetes in the region stands at approximately 4.5% among those aged  
101 between 20-79 years. In 2021 alone, over 306,000 people under 60-years of age died  
102 due to diabetes in SSA<sup>3</sup>. It is estimated that each person with diabetes incurs  
103 approximately USD 547 per year on healthcare (both patient and health system direct  
104 costs) in SSA as of 2021.

105

106 Most cases of diabetes can be classified into two types: Type 1 diabetes (T1D) is most  
107 common in children and results from the destruction of insulin-producing beta cells,  
108 mostly by autoimmune mechanisms<sup>4</sup>. Type 2 diabetes (T2D) is a metabolic disorder  
109 characterised by insulin resistance and relative insulin deficiency and, although it can  
110 occur at any age, it is most common among adults<sup>5</sup>. T2D is linked to physical inactivity

111 and an unhealthy diet, and accounts for approximately 90% of all diabetes cases  
112 globally<sup>6</sup>.

113

114 While regional estimates are available to support policy making, there is a need to  
115 understand the country-specific disease burdens (national and sub-national) to inform  
116 target policy at a local level that yields effective and economically efficient impact.

117 Unfortunately, existing estimates of country-specific diabetes burden are sparse in low  
118 and lower middle-income settings, especially in SSA. This makes it difficult to identify  
119 and implement appropriate targeted interventions that are feasible and affordable by  
120 a given country considering the existing financial constraints of the health budgets.

121 Countries in SSA are starting to adopt health technology assessment (HTA) as a  
122 decision-making aid to identify and implement appropriate interventions while  
123 maximizing value for money. Figure 1 illustrates the main steps involved in HTA  
124 processes as adapted from Siegfried et al.<sup>7</sup>

125

126

127

128 ***Figure 1: The HTA process***

129

130 HTA can be defined as a multidisciplinary process that uses explicit methods, often  
131 involving cost-effectiveness analysis, to determine the value of a health technology at  
132 different points in its lifecycle<sup>8</sup>. The HTA process typically starts with identifying  
133 relevant alternatives linked to a policy need (defining the decision space). This is then  
134 followed by the gathering and synthesis of various sources of evidence to arrive at an  
135 understanding of the relative value for money of the alternatives (the analysis or  
136 assessment step). There is then an appraisal of that evidence involving some form of

137 deliberative process against decision criteria, leading to the development of  
138 recommendations and the subsequent implementation of preferred options.  
139 Information gathered from implementation can be used to inform a future HTA. An  
140 important input into the conduct of HTA includes having credible estimates of disease  
141 burden, which will be important in informing key parameters in any cost-effectiveness  
142 model<sup>9</sup>.

143  
144 Ghana has adopted the use of HTA to inform decision making within the health  
145 sector<sup>10</sup>. This commitment to evidence-informed priority setting has included the  
146 development and implementation of an HTA process guide, officially launched in  
147 December 2022<sup>11</sup>. The Ghana Ministry of Health has indicated an interest in using  
148 HTA to inform decision making in diabetes management and prevention. Such an  
149 approach requires up-to date information about the current epidemiological and  
150 economic burden of diabetes in the country, which is currently unavailable<sup>12</sup>.

151  
152 To address this need, our study aims to undertake a scoping review of the peer-  
153 reviewed literature to identify, map and estimate the burden of diabetes in Ghana, in  
154 terms of epidemiological distribution, health outcomes and economic consequences.  
155 It is anticipated this work will support optimising current NCD country policy, especially  
156 in relation to priority setting, as well inform the parameterisation of model-based  
157 analyses and highlight existing knowledge gaps to guide future research in this area.

158

159

160

## 161 **Methods**

## 162 **Study design**

163 We followed the Arksey and O'Malley framework for scoping reviews<sup>13</sup>. The  
164 framework consists of five stages which were followed: (i) identifying the research  
165 question; (ii) identifying relevant studies; (iii) selecting appropriate studies; (iv) charting  
166 and collating the data, and (v) summarising and reporting the results. The detailed  
167 search protocol is available in Appendix 1. A study protocol is available although not  
168 registered. The Preferred Reporting Items for Systematic Reviews and Meta-Analyses  
169 Extension for Scoping Reviews (PRISMA-ScR) was followed when reporting the  
170 results<sup>14</sup>. We examined the following aspects of burden: (1) epidemiological  
171 distribution (incidence, prevalence, demographic distribution), (2) impact on health  
172 outcomes (comorbidity or complications, health effects in disability adjusted life years  
173 (DALYs), quality adjusted life years (QALYs), mortality among others), and (3)  
174 economic consequences (cost of care, loss of productivity, or out of pocket  
175 expenditure).

176

## 177 **Eligibility criteria and study selection**

178 A study was considered eligible for inclusion if it was published in a peer-reviewed  
179 journal and reported burden of disease in Ghana reflecting at least one of the three  
180 dimensions highlighted above. To ensure relevance, we only included studies  
181 published after 2009. All study designs were considered for inclusion without  
182 restrictions. There were also no restrictions on population, age or sex. Literature  
183 reporting only the qualitative experience of diabetic patients, and those assessing the  
184 relationship between socioeconomic status (SES), gender, and diabetes as a health

185 outcome were excluded. Studies published in languages other than English were also  
186 excluded.

187

188

## 189 **Information Sources**

190 We searched the following electronic databases: Medline, Embase, Web of Science,  
191 Scopus, Cochrane and African Index Medicus. The databases were searched on 4<sup>th</sup>  
192 April 2021 following a systematic search strategy and a second search was done on  
193 11<sup>th</sup> April 2023 to find all new articles that were published since the previous search.

194

## 195 **Search strategy**

196 We used two broad key terms ('Ghana' and 'diabetes') as well as similar derivatives,  
197 to identify the literature on the burden of disease. Search strings were tailored to the  
198 different databases (appendix 1).

199

## 200 **Selection process**

201 The retrieved articles from the search were listed and uploaded to Covidence  
202 software<sup>15</sup> which was used to identify and remove duplicates, carry out the screening  
203 process and full-text review. A standard process of screening articles by title and  
204 abstract, followed by full-text reading was followed to assess eligibility to be included  
205 in this study. These steps were conducted by two independent researchers (MG &  
206 JK). Any discrepancies in the assessment decision were discussed and resolved by  
207 reaching a consensus between the two researchers.

208



## 209 **Data charting**

210 A data extraction sheet was used to extract relevant information from included studies  
211 to allow us to map and highlight the main results and categorize findings in relation to  
212 the research question. Information extracted included: author name, publication year,  
213 form of diabetes burden being reported (such as prevalence, incidence, economic,  
214 etc), study design, target population, geographical region, setting (urban or rural), and  
215 main findings.

216

217 Our charting approach allowed us to interpret data from included studies according to  
218 the forms of diabetes burden which we henceforth refer to as themes. The extracted  
219 data was grouped under three themes (epidemiological, health outcomes, economic).  
220 We used simple visualisation and basic descriptive analytical techniques to summarise  
221 and report the scoping review findings.

222

## 223 **Synthesis of results**

224 We organised extracted data quantitatively following the themes. We produced tables  
225 and charts in relation to the following: the distribution of studies geographically and  
226 per type of burden, target groups; the research methods adopted, and health outcome  
227 measures used.

228

229

230

231

232

233

234

## 235 **Results**

236 The electronic database search yielded 1103 records after deduplication. Figure 2  
237 below shows the PRISMA flowchart.

238

239 *Figure 2: PRISMA flow chart*

240

241

242

## 243 **Study characteristics**

244 A total of 36 studies fulfilled the inclusion criteria. Table 1 shows the characteristics of  
245 the included studies. All studies were observational studies with a majority having a  
246 cross-sectional design (n=30); there were four longitudinal studies<sup>16–19</sup> and two case  
247 control studies<sup>20,21</sup>. The longitudinal studies were based on either panel data or cohort  
248 study data.

249

250 All studies included adults (persons aged 18 and above) as their target population.  
251 Three studies focused on people above the age of 50 years<sup>22–24</sup>. Forms of burden  
252 reported in the studies were prevalence (n=16), complications and comorbidity (n=17),  
253 incidence (n=2)<sup>18,19</sup>, economic (n=1)<sup>25</sup> and mortality (n=1)<sup>17</sup>. All studies either reported  
254 on T2D or diabetes in general (without specifying the type).

255

256 Notably, most of the extracted studies were carried out in Ashanti region (n=14),  
257 followed by Volta (n=4)<sup>26–29</sup>, Greater Accra (n=3)<sup>30–32</sup>, Central (n=1)<sup>33</sup>, Northern  
258 (n=1)<sup>34</sup> and Brong Ahafo (n=1)<sup>35</sup>. Four studies were carried out in more than one  
259 region while five studies took a whole country perspective<sup>22–24,36,37</sup>. No study was  
260 carried out that specifically focused on the following regions: Upper East, Upper West,  
261 Western, and Eastern.

262

263

264 **Table 1: Table of study characteristics**

| Author                                | Public<br>ation<br>year | Study<br>design | Target<br>population                 | Form<br>of<br>the Burden | Specific burden                                                                                                                 | Region                         |
|---------------------------------------|-------------------------|-----------------|--------------------------------------|--------------------------|---------------------------------------------------------------------------------------------------------------------------------|--------------------------------|
| Gatimu et al. <sup>22</sup>           | 2016                    | Cross-sectional | Adults 50 years and above            | Prevalence               | Prevalence of diabetes and risk factors                                                                                         | National                       |
| Bawah et al. <sup>26</sup>            | 2019                    | Cross-sectional | Adults 30 years and above            | Prevalence               | Prevalence of T2D and pre-diabetes                                                                                              | Volta region                   |
| Kojo Anderson <sup>38</sup>           | 2017                    | Cross-sectional | Adults 18 years and above            | Prevalence               | Prevalence of T2D                                                                                                               | Western Region, Central Region |
| Vuvor et al. <sup>30</sup>            | 2011                    | Cross-sectional | Adults 36 years and above            | Prevalence               | Prevalence of diabetes and risk factors                                                                                         | Greater Accra                  |
| Chilunga et al. <sup>39</sup>         | 2019                    | Cross sectional | Adults 25 -70 years with BMI<25kg/m2 | Prevalence               | Prevalence of T2D                                                                                                               | Ashanti region                 |
| Gato et al. <sup>33</sup>             | 2017                    | Cross-sectional | Adults 18 years and above            | Prevalence               | Prevalence of diabetes                                                                                                          | Central Region                 |
| Yorke et al. <sup>23</sup>            | 2020                    | Cross-sectional | Adults 50 years and above            | Prevalence               | Prevalence of diabetes                                                                                                          | National                       |
| Agyemang et al. <sup>40</sup>         | 2016                    | Cross sectional | Adults 25 -70 years                  | Prevalence               | Prevalence of T2D and Obesity                                                                                                   | Ashanti region                 |
| Tyrovolas et al. <sup>36</sup>        | 2015                    | Cross-sectional | Adults 18 years and above            | Prevalence               | Prevalence of diabetes                                                                                                          | National                       |
| Annani-Akollor et al. <sup>41</sup>   | 2019                    | Cross-sectional | Adults 18 years and above            | Complications            | Complications of T2D: Macrovascular, microvascular, neuropathy, nephropathy, retinopathy, sexual dysfunction, DKA, hypoglycemia | Ashanti region                 |
| Hayfron-Benjamin et al. <sup>37</sup> | 2019                    | Cross-sectional | Adults above 25 years with T2D       | Complications            | Complications of T2D: Macrovascular, microvascular, coronary artery disease, nephropathy, retinopathy, PAD, stroke              | National                       |
| Nsiah et al. <sup>42</sup>            | 2015                    | Cross-sectional | Adults 20 - 80 years with T2D        | Complications            | Prevalence of comorbidities and risk factors (Metabolic Syndrome, hypertension, dyslipidemia)                                   | Ashanti region                 |
| Mogre et al. <sup>34</sup>            | 2014                    | Cross-sectional | Adults 18 years and above with T2D   | Comorbidi<br>tes         | Prevalence of MetS among diabetic patients                                                                                      | Northern region                |

|                                     |      |                       |                                                  |                              |                                                    |                                              |
|-------------------------------------|------|-----------------------|--------------------------------------------------|------------------------------|----------------------------------------------------|----------------------------------------------|
| Agyemang-Yeboah et al <sup>43</sup> | 2019 | Cross-sectional       | Patients with diabetes                           | Comorbidities                | Prevalence of MetS among diabetic patients         | Ashanti Region                               |
| Antwi-Bafour et al <sup>20</sup>    | 2016 | case-control          | Patients with T2D                                | Comorbidities                | Prevalence of anaemia among diabetics              | Not mentioned                                |
| Akpalu et al <sup>31</sup>          | 2018 | Cross-sectional       | Adults 30 -65 years with T2D                     | Comorbidities                | Prevalence of depression among T2D patients        | Greater Accra                                |
| Sarfo et al <sup>16</sup>           | 2018 | Longitudinal (Cohort) | Adults 18 years and above                        | Comorbidities                | Prevalence of stroke among diabetics               | Eastern, Ashanti, Northern Regions           |
| Osei-Yeboah et al <sup>27</sup>     | 2017 | Cross-sectional       | Patients with T2D                                | Comorbidities                | Prevalence of MetS among diabetic patients         | Volta region                                 |
| Opore-Addo et al <sup>44</sup>      | 2020 | Cross-sectional       | Adults 18 years and above                        | Comorbidities                | Prevalence of hypertension among diabetics         | Ashanti region                               |
| Sarfo-Kantanka et al <sup>17</sup>  | 2016 | Longitudinal (panel)  | Patients with T2D admitted to hospital           | Mortality                    | Mortality trend for 31 years                       | Ashanti region                               |
| Lartey & Aikins <sup>45</sup>       | 2018 | Cross-sectional       | Patients with diabetes attending Diabetic clinic | Comorbidities                | Prevalence of visual impairment among diabetics    | Ashanti region                               |
| Nimako et al <sup>32</sup>          | 2013 | Cross-sectional       | Patients with T2D attending General Hospital     | Prevalence and comorbidities | Prevalence of diabetes and hypertension            | Greater Accra Region                         |
| Atosona & Larbie <sup>46</sup>      | 2019 | Cross-sectional       | Patients with T2D at the outpatient clinic       | Complications                | Prevalence of diabetic foot                        | Greater Accra, Ashanti, and Northern regions |
| Sarfo-Kantanka et al <sup>18</sup>  | 2019 | Longitudinal (Cohort) | Patients with T2D at the diabetes clinic         | Incidence                    | Incidence rate of diabetes-related LLA             | Ashanti region                               |
| Sarfo-Kantanka et al <sup>19</sup>  | 2018 | Longitudinal (panel)  | Patients with T2D at the diabetes clinic         | Incidence                    | Trend of incidence and predictors of diabetic foot | Ashanti region                               |
| Quaye et al <sup>25</sup>           | 2015 | Cross-sectional       | Patients with diabetes                           | Economic                     | Annual costs                                       | Greater Accra, Ashanti, Eastern Regions      |
| Tarekegne et al <sup>24</sup>       | 2018 | Cross-sectional       | Adults 50 years or above                         | Prevalence                   | Prevalence of DM                                   | National                                     |
| Cook-Huynh et al <sup>47</sup>      | 2012 | Cross-sectional       | Adults 18 years or above                         | Prevalence                   | Prevalence of DM                                   | Ashanti region                               |
| Sarfo-Kantanka et al <sup>48</sup>  | 2014 | Cross-sectional       | Adults 18 years or above                         | Prevalence                   | Prevalence of DM                                   | Ashanti region                               |
| Agbogli et al <sup>49</sup>         | 2017 | Cross-sectional       | Adults 18 years or above                         | Prevalence                   | Prevalence of DM                                   | Ashanti region                               |
| Quaicoe et al <sup>21</sup>         | 2017 | case-control          | Adults aged 18-64+ years                         | Prevalence                   | Prevalence of DM                                   | Ashanti region                               |

|                                |      |                 |                               |               |                                                  |                    |
|--------------------------------|------|-----------------|-------------------------------|---------------|--------------------------------------------------|--------------------|
| Odame Anto et al <sup>50</sup> | 2021 | Cross-sectional | Adults aged 30 years or above | Complications | Prevalence of MetS among diabetic patients       | Ashanti region     |
| Abagre et al <sup>35</sup>     | 2022 | Cross-sectional | Adults aged 30-79 years old   | Complications | Prevalence of MetS among diabetic patients       | Brong-Ahafo region |
| Abu et al <sup>51</sup>        | 2022 | Cross-sectional | Adults aged 38-85 years old   | Complications | Prevalence of dry eye disease among T2D patients | Central region     |
| Tuglo et al <sup>28</sup>      | 2022 | Cross-sectional | Adults                        | Complications | Prevalence of diabetic ulcers                    | Volta region       |
| Ellahi et al <sup>29</sup>     | 2022 | Cross-sectional | Adults 18 years or above      | Prevalence    | Prevalence of DM                                 | Volta region       |

265

266

## 267 **Publication trend**

268 The number of publications by year (figure 3) broadly shows an increasing trend  
 269 between 2009 and 2019 and a dip after 2019. Most articles were published in 2019  
 270 (n=7) before a decline in 2020.

271 ***Figure 3: Number of studies/publications per year***

272

## 273 **Forms of the burden of diabetes (themes) in Ghana**

274 Our charting analysis mapped the studies across three main themes: epidemiological,  
 275 health outcomes, and economic. The epidemiological theme included prevalence of  
 276 diabetes (n=16) and incidence (n=2). The health outcomes theme (n=17) was  
 277 comprised of studies reporting on complications (n=6), comorbidities (n=10) and  
 278 mortality (n=1). Finally, the economic theme (n=1) included costs of diabetes services.  
 279 Some studies reported both the prevalence of diabetes and comorbidities (n=1).  
 280 Figure 4 demonstrates the percentage of included studies by theme.

281

282 ***Figure 4: Percentage of included studies by form of burden (theme)***

283

284

## 285 **Frequency of theme by region**

286 The Ashanti and Greater Accra regions were the most frequently targeted regions  
287 across all studies, with reported studies covering all the three themes. We found data  
288 on both prevalence and outcomes in the Volta and Central regions. The Western  
289 region had only prevalence data reported while Brong-Ahafo and Northern regions  
290 had studies that reported on health outcomes only. No data was found for the  
291 remaining regions. Five studies were conducted using a nationally representative  
292 sample. Figure 5 shows the frequency of themes by region from all included studies  
293 (including single and multi-region studies).

294

295

296

297

298 ***Figure 5: Frequency of burden of disease themes reported by region***

299

300

301

302

303

### 304 **1) Epidemiological burden**

305 The reported prevalence of diabetes at national level in Ghana ranged between  
306 2.80%<sup>23,24</sup> – 3.95%<sup>22</sup>. At sub-national levels, the Western region reported the highest  
307 prevalence of diabetes: 39.80% among those 18 years and older<sup>38</sup>. The second  
308 highest prevalence of diabetes (25.20%) was reported in Ashanti region<sup>48</sup> followed by  
309 24.60% in the Central region<sup>38</sup>.

310

311 In the national studies, the prevalence of diabetes was generally higher in women in  
312 comparison to men<sup>22,24,36</sup>. Regionally, the prevalence of diabetes was also notably

313 higher in females compared to males, with the exception of the Ashanti region<sup>26,30,48,49</sup>.  
 314 Urban areas had a higher prevalence than rural areas<sup>22–24,39,40</sup>.  
 315  
 316 Prevalence studies only covered five of the ten administrative regions: Ashanti (n=6),  
 317 Volta (n=3), Central (n=2), Greater Accra (n=2), and Western (n=1) regions. There  
 318 were four national-level studies. The majority of prevalence studies were focused on  
 319 adults aged 18 years old and above (n=7), followed by adults 50 years and above  
 320 (n=4). Table 2 shows the summary of studies that reported the prevalence of diabetes  
 321 in Ghana.

322  
 323 **Table 2: Summary of findings of studies reporting the prevalence of diabetes in Ghana**

| Author and Year                          | Region        | Age groups                  | Sample size | Diagnostic criteria                                            | Prevalence % (95% CI) |               |                 |                 |                |
|------------------------------------------|---------------|-----------------------------|-------------|----------------------------------------------------------------|-----------------------|---------------|-----------------|-----------------|----------------|
|                                          |               |                             |             |                                                                | Overall               | Male          | Female          | Urban           | Rural          |
| Tyrovolas et al. 2015 <sup>36</sup>      | National      | Adults 50 years or above    | 52,946      | Self-reported                                                  | 3.9 (2.4 - 6.2)       | NR            | NR              | NR              | NR             |
| Gatimu et al. 2016 <sup>22</sup>         | National      | Adults 50 years or above    | 4,089       | Self-reported                                                  | 4.0 (3.4 - 4.6)       | 1.7 (1.3–2.3) | 2.2 (1.7 - 2.8) | 6.2 (4.8 - 8.0) | 2.3 (1.7-3.3)  |
| Tarekegne et al. 2018                    | National      | Adults 50 years or above    | 4,289       | Self-reported                                                  | 2.8                   | 2.5           | 3.3             | 4.7             | 1.5            |
| Yorke et al. 2020 <sup>23</sup>          | National      | Adults 50 years or above    | 3,350       | Self-reported                                                  | 2.8 (2.0 - 3.9)       | 2.8           | 2.8             | 4.4             | 1.3            |
| Cook-Huynh et al. 2012 <sup>47</sup>     | Ashanti       | Adults 18 years or above    | 326         | WHO diagnostic criteria                                        | NR                    | NR            | NR              | NR              | 7.7 (5.0-11.0) |
| Sarfo-Kantanka et al. 2014 <sup>48</sup> | Ashanti       | Adults 18 years or above    | 1,292       | WHO diagnostic criteria (fasting blood glucose only)           | 25.2                  | 25.7          | 24.4            | NR              | NR             |
| Agyemang et al. 2016 <sup>40</sup>       | Ashanti       | Adults aged 25-70 years old | 820         | WHO diagnostic criteria                                        | NR                    | NR            | NR              | 8.3             | 5.7            |
| Agbogli et al 2017 <sup>49</sup>         | Ashanti       | Adults 18 years or above    | 113         | WHO diagnostic criteria (fasting blood glucose only)           | 3.5                   | 5.9           | 2.5             | NR              | NR             |
| Chillunga et al. 2019 <sup>39</sup>      | Ashanti       | Adults aged 25-70 years old | 1,436       | WHO diagnostic criteria                                        | 5.7                   | NR            | NR              | 8.8             | 3.6            |
| Opere-Addo et al. 2020 <sup>44</sup>     | Ashanti       | Adults 18 years or above    | 684         | Self-reported                                                  | 5.4                   | NR            | NR              | NR              | NR             |
| Vuvor et al. 2011 <sup>30</sup>          | Greater Accra | Adults aged 36-95 years old | 597         | Urinary dipsticks and FBG determinations (level not mentioned) | 3.9                   | 3.5           | 4.2             | NR              | NR             |
| Bawah et al. 2019 <sup>26</sup>          | Greater Accra | NA                          | 130         | HBA1C ≥ 6.5%                                                   | 5.4                   | NR            | NR              | NR              | NR             |

|                                    |                     |                          |     |                                                  |              |     |     |    |    |
|------------------------------------|---------------------|--------------------------|-----|--------------------------------------------------|--------------|-----|-----|----|----|
| Quaicoe et al. 2017 <sup>21</sup>  | Volta               | Adults aged 18-64+ years | 226 | American Diabetes Association Criteria 2010      | 8.6          | NR  | NR  | NR | NR |
| Bawah et al. 2019 <sup>26</sup>    | Volta               | Adults 30 years or above | 202 | American Diabetes Association criteria 2010      | 6.9          | 6.5 | 7.1 | NR | NR |
| Ellahi et al. 2022 <sup>29</sup>   | Volta               | Adults 18 and above      | 850 | WHO diagnostic criteria                          | 4.4          | NR  | NR  | NR | NR |
| Gato et al. 2017 <sup>33</sup>     | Central             | Adults 18-80 years       | 482 | Self-reported                                    | 8.3          | NR  | NR  | NR | NR |
| Anderson et al. 2017 <sup>38</sup> | Central and Western | Adults 18 years or above | 976 | Fasting Blood Glucose $\geq$ 126mg/dl (7 mmol/L) | 24.6 to 39.8 | NR  | NR  | NR | NR |

324 NR- Not reported

325

326

327

328

## 2) Common complications and comorbidity

329 Seven complications and/or comorbidities were identified in this review (figure 6).

330 Studies on complications and comorbidities were only found for six of the ten

331 administrative regions: Ashanti (n=9), Northern (n=2), Greater Accra (n=2), Volta

332 (n=2), Brong-Ahafo (n=1) and Central (n=1). In addition, a multi-region (sub-national)

333 study combining populations from Greater Accra, Ashanti, and Northern regions (n=1)

334 was identified along with a study that did not specify location (n=1). No study was

335 conducted at the national level for complications and comorbidities of diabetes.

336

337 The most common complication types reported in the included studies were metabolic

338 syndrome (n=6), followed by macrovascular and/or microvascular complications (n=4)

339 and diabetic foot and/or lower extremity amputation (n=4), hypertension (n=3),

340 anaemia (n=1), depression (n=1) and dry eye disease (n=1). Figure 6 shows the

341 number of studies per region by complication type.

342



343 ***Figure 6: Number of studies per region by complication type***

344

345 The prevalence of micro and macrovascular complications among people with  
346 diabetes varied: coronary artery disease (CAD) ranged between 18.4%<sup>37</sup> and 31.8%<sup>41</sup>,  
347 peripheral arterial disease (PAD) between 11.2%<sup>37</sup> and 19%<sup>17</sup>, neuropathy between  
348 18.3%<sup>17</sup> and 20.8%<sup>41</sup>, nephropathy between 12.5%<sup>41</sup> and 44.70%<sup>17</sup>, and retinopathy  
349 between 6.5%<sup>41</sup> and 13.7%<sup>45</sup>.

350

351 Six studies assessed the prevalence of metabolic syndrome in diabetic patients in  
352 Ghana in the regions of Ashanti, Northern, Volta and Brong-Ahafo. The highest  
353 prevalence rate of metabolic syndrome was reported in the Ashanti region, with  
354 prevalence ranging between 42%<sup>50</sup> and 90%<sup>43</sup>. This was followed by Brong-Ahafo with  
355 68.6%<sup>35</sup>, the Volta region with 43.8%<sup>27</sup>, and Northern region with 24%<sup>34</sup>. The  
356 prevalence of hypertension among diabetic patients was assessed in three studies  
357 that included populations of Ashanti, Northern, and Greater Accra regions. The highest  
358 prevalence of hypertension as a complication/ comorbidity of diabetes was reported in  
359 the Greater Accra region (36.60%). This was followed by the Northern region (21%),  
360 and the Ashanti region (1.61%).

361

362 Diabetic foot disorders and lower extremity amputation were assessed in four studies.

363 Two longitudinal studies were conducted in Komfo Anokye Teaching Hospital in the  
364 Ashanti region reporting a mean incidence of foot disorders and average incidence  
365 rate of diabetes related amputations of 8.39% (5.27% males and 3.12% females)<sup>19</sup> and  
366 2.4 (95% CI:1.84–5.61) per 1000 follow-up years<sup>18</sup> respectively among diabetes  
367 patients. The third study was a cross-sectional study that randomly selected patients

368 from the outpatient diabetes clinics of three tertiary hospitals from Greater Accra,  
 369 Ashanti, and Northern regions and reported a prevalence of 11% for diabetic foot  
 370 ulcers and 3% for lower extremity amputations. The fourth study was also cross  
 371 sectional in Volta region focusing on diabetic foot ulcers<sup>28</sup>.

372

373 One study assessed the prevalence of depression among diabetic patients at the  
 374 National Diabetes Management and Research Centre, Korle Bu Teaching Hospital in  
 375 Greater Accra region<sup>31</sup>. The study reported that 31% of diabetic patients suffered from  
 376 depression in 2018. Finally, a case-control study reported that 84.8 % of patients with  
 377 diabetes had haemoglobin concentrations that were significantly lower than the  
 378 general population. Table 3 provides a summary of findings stratified by complication  
 379 type and geographic region in Ghana.

380

381

382 *Table 3: Summary of studies that reported on the prevalence of complications/comorbidities for*  
 383 *diabetics in Ghana*

| <b>Metabolic syndrome</b> |                                           |                             |                                                                                                                     |                    |                            |                                                                                                                                                                                                                                           |
|---------------------------|-------------------------------------------|-----------------------------|---------------------------------------------------------------------------------------------------------------------|--------------------|----------------------------|-------------------------------------------------------------------------------------------------------------------------------------------------------------------------------------------------------------------------------------------|
| <b>Region</b>             | <b>Author and date</b>                    | <b>Target population</b>    | <b>Context</b>                                                                                                      | <b>Sample size</b> | <b>Diagnostic criteria</b> | <b>Main results</b>                                                                                                                                                                                                                       |
| <b>Ashanti</b>            | Nsiah et al. 2015 <sup>42</sup>           | Adults aged 20-86 years old | T2D patients attending the Diabetic Centre of the Komfo Anokye Teaching Hospital in Kumasi, Ashanti region          | 150                | NCEP/ATP III               | The overall percentage prevalence of MetS was 58%. Males had a lower percentage prevalence of 22.99%, compared to a higher percentage prevalence of 77.01% for females.                                                                   |
| <b>Ashanti</b>            | Agyemang-Yeboah et al. 2019 <sup>43</sup> | NA                          | Diabetic patients attending the Diabetic Clinic of the Komfo Anokye Teaching Hospital (KATH) Kumasi, Ashanti Region | 405                | NCEP/ATP III               | The prevalence of metabolic syndrome observed among the study population was 90.6%. However, the MS condition among female participants (94.1%) was significantly higher than that of their male counterparts (76.5%) with $p < 0.0001$ . |

|                                                         |                                       |                             |                                                                                                                     |                    |                                             |                                                                                                                                                                                                                                                                                                                                                                                                                                                                                                                                       |
|---------------------------------------------------------|---------------------------------------|-----------------------------|---------------------------------------------------------------------------------------------------------------------|--------------------|---------------------------------------------|---------------------------------------------------------------------------------------------------------------------------------------------------------------------------------------------------------------------------------------------------------------------------------------------------------------------------------------------------------------------------------------------------------------------------------------------------------------------------------------------------------------------------------------|
| <b>Ashanti</b>                                          | Odame Anto et al 2021 <sup>50</sup>   | Adults 30 years or above    | Diabetic patients attending the Diabetic Clinic of the Komfo Anokye Teaching Hospital (KATH) Kumasi, Ashanti Region | 241                | NCEP/ATP III                                | The prevalence of metabolic syndrome observed among the study population was 42.7%. Among females, 52.8% (75/142) had MetS                                                                                                                                                                                                                                                                                                                                                                                                            |
| <b>Northern</b>                                         | Mogres et al. 2014 <sup>34</sup>      | NA                          | Patients diagnosed with T2D receiving care from an outpatient clinic of the Tamale Teaching Hospital                | 200                | IDF Consensus                               | The prevalence of MetS was 24.0% (n=48). The prevalence was higher in women (27.3%, n= 42) compared to men (13.0%, n=6). The commonest occurring components of the MetS included abdominal obesity (77.0%) and elevated FPG (77.0%) denoting uncontrolled diabetes. The prevalence of elevated BP was found to be 44.0%(n=88) and was higher in men (56.5%) than in women (40.3%).                                                                                                                                                    |
| <b>Volta</b>                                            | Osei-Yeboah et al. 2017 <sup>27</sup> | Adults aged 25-86 years old | Diabetic patients attending diabetic management clinic at the Ho Municipal Hospital in the Volta Region             | 162                | NCEP-ATP III, the WHO, and the IDF criteria | The overall prevalence of metabolic syndrome among the study population was 43.83%, 63.58%, and 69.14% using the NCEP-ATP III, the WHO, and the IDF criteria, respectively. The most predominant component among the study population was high blood pressure using the NCEP-ATP III (108 (66.67%)) and WHO (102 (62.96)) criteria and abdominal obesity (112 (69.14%)) for IDF criteria. High blood pressure was the most prevalent component among the males while abdominal obesity was the principal component among the females. |
| <b>Brong-Ahafo</b>                                      | Abagre et al <sup>35</sup>            | Adults aged 30-79 years old | Diabetic patients enrolled at selected diabetes clinics (Dormaa Presbyterian and Berekum Holy Family Hospitals)     | 430                | NCEP-ATP III, the WHO criteria              | The prevalence of MS was 68.6% (95% CI: 64.0–72.8), higher among women (76.3%, 95% CI: 70.6–81.2) than men (58.0%, 95% CI: 35.0–49.4) and in the 50–59-year age group (32.1%)                                                                                                                                                                                                                                                                                                                                                         |
| <b>Diabetic foot and or lower extremity amputations</b> |                                       |                             |                                                                                                                     |                    |                                             |                                                                                                                                                                                                                                                                                                                                                                                                                                                                                                                                       |
| <b>Region</b>                                           | <b>Author and date</b>                | <b>Target population</b>    | <b>Context</b>                                                                                                      | <b>Sample size</b> | <b>Diagnostic criteria</b>                  | <b>Main results</b>                                                                                                                                                                                                                                                                                                                                                                                                                                                                                                                   |

|                                             |                                          |                          |                                                                                                                                                                                              |                    |                                                                 |                                                                                                                                                                                                                                                                   |
|---------------------------------------------|------------------------------------------|--------------------------|----------------------------------------------------------------------------------------------------------------------------------------------------------------------------------------------|--------------------|-----------------------------------------------------------------|-------------------------------------------------------------------------------------------------------------------------------------------------------------------------------------------------------------------------------------------------------------------|
| <b>Ashanti</b>                              | Sarfo-Kantanka et al. 2018 <sup>19</sup> | NA                       | Patients enrolled with the diabetes clinic of Komfo Anokye Teaching Hospital, a tertiary hospital in Kumasi.                                                                                 | 7,383              | Diabetic foot disorders include foot ulcers, PADs, and gangrene | The mean incidence of foot disorders was 8.39% (5.27% males and 3.12% females). An increase in the incidence of diabetic foot ranging from 3.25% in 2005 to 12.57% in 2016, $p < 0.001$ , was determined.                                                         |
| <b>Ashanti</b>                              | Sarfo-Kantanka et al. 2019 <sup>18</sup> | NA                       | Patients enrolled with the diabetes clinic of Komfo Anokye Teaching Hospital, a tertiary hospital in Kumasi.                                                                                 | 3,143              | The global lower extremity amputation study                     | The average incidence rate of diabetes-related amputation was 2.4 (95% CI:1.84–5.61) per 1000 follow-up years: increasing from 0.6% (95% CI:0.21–2.21) per 1000 follow-up years in 2010 to 10.9% (95% CI:6.22–12.44) per 1000 follow-up years in 2015.            |
| <b>Greater Accra, Ashanti, and Northern</b> | Atosona et al. 2019 <sup>46</sup>        | NA                       | Randomly selected patients from the outpatient diabetes clinics of three tertiary hospitals namely: Korle Bu Teaching Hospital, Komfo Anokye Teaching Hospital, and Tamale Teaching Hospital | 100                | International Consensus on Diabetic Foot                        | Among the patients, 11% had diabetic foot ulcers whilst 3% had lower extremity amputations.                                                                                                                                                                       |
| <b>Volta</b>                                | Tuglo et al. <sup>28</sup>               | NA                       | Diabetic patients attending selected diabetic clinics (Ho Teaching Hospital, Ho Municipal Hospital, Hohoe Municipal Hospital, and Margret Marquart Catholic Hospital)                        | 473                | Not mentioned                                                   | Foot ulcers were observed in 41 (8.7%) diabetic patients                                                                                                                                                                                                          |
| <b>Hypertension</b>                         |                                          |                          |                                                                                                                                                                                              |                    |                                                                 |                                                                                                                                                                                                                                                                   |
| <b>Region</b>                               | <b>Author and date</b>                   | <b>Target population</b> | <b>Context</b>                                                                                                                                                                               | <b>Sample size</b> | <b>Diagnostic criteria</b>                                      | <b>Main results</b>                                                                                                                                                                                                                                               |
| <b>Ashanti</b>                              | Opere-Addo et al. 2020 <sup>44</sup>     | Adults 18 years or above | Rural districts in the Ashanti region of Ghana (Amansie West and Offinso North, Asante Akim South and Ahafo Ano South)                                                                       | 684                | NA                                                              | The prevalence of hypertension was 111 (16.23%). Diabetes was prevalent in 37 (5.41%) of the study participants; thus, the prevalence of hypertension and diabetes was 137 (20.02%). The prevalence of diabetes and hypertension as a comorbidity was 11 (1.61%). |

| <b>Greater Accra</b>                                | Nimako et al. 2018 <sup>32</sup>         | Adults 18 years or above | Patients attending Tema General Hospital (TGH) in the Greater Accra Region                                  | 1,527              | NA                         | The prevalence of multimorbidity was 38.8%, and around half (48.6%) of the patients with multimorbidity were aged between 18–59 years old. The most common combination of conditions was hypertension and diabetes mellitus (36.6%), hypertension and musculoskeletal conditions (19.9%), and hypertension and other cardiovascular conditions (11.4%).                                                                   |
|-----------------------------------------------------|------------------------------------------|--------------------------|-------------------------------------------------------------------------------------------------------------|--------------------|----------------------------|---------------------------------------------------------------------------------------------------------------------------------------------------------------------------------------------------------------------------------------------------------------------------------------------------------------------------------------------------------------------------------------------------------------------------|
| <b>Northern</b>                                     | Mogre et al. 2014 <sup>34</sup>          | NA                       | Previously diagnosed diabetes mellitus patients attending a diabetic clinic at the Tamale Teaching Hospital | 100                |                            | In general, 7.0% of the participants were underweight and 32.0% were overweight or obese. 21% of the studied participants were hypertensive. Prevalence of hyperglycaemia was higher among patients aged ≤40 years (88.9% vs. 75.8%)                                                                                                                                                                                      |
| <b>Micro and Macro vascular complications of DM</b> |                                          |                          |                                                                                                             |                    |                            |                                                                                                                                                                                                                                                                                                                                                                                                                           |
| <b>Region</b>                                       | <b>Author and date</b>                   | <b>Target population</b> | <b>Context</b>                                                                                              | <b>Sample size</b> | <b>Diagnostic criteria</b> | <b>Main results</b>                                                                                                                                                                                                                                                                                                                                                                                                       |
| <b>Ashanti</b>                                      | Sarfo-Kantanka et al. 2016 <sup>17</sup> | NA                       | Diabetes admissions at Komfo Anokye Teaching Hospital (KATH) in Kumasi                                      | 11,414             | NA                         | Two thousand three hundred and ninety-two (21.0%) diabetic admissions were due to end-organ complications. Of these, 503 (18.7%) had peripheral vascular diseases, 377(14.0%) had coronary artery diseases, peripheral neuropathic ulcers (26.4%), 529 nephropathies (18.3%), 282 (10.5%) cerebrovascular diseases. Again 1207(44.8%) had nephropathy and 325(12.0) had peripheral neuropathic ulcers.                    |
| <b>Ashanti</b>                                      | Lartey et al. 2018 <sup>45</sup>         | Adults 18 years or above | Diabetic Center and the Eye Department of a tertiary teaching hospital in the Ashanti region of Ghana       | 208                | NA                         | Non-insulin-dependent diabetics constituted 97.1% whilst 2.9% were insulin-dependent diabetics. The prevalence of the outcome measures was: Cataract (23.7%) mild and moderate retinopathy (13.7%) severe proliferative retinopathy (1.8%) maculopathy (6.8%). The prevalence of low vision and blindness was 18.4%. Amongst diabetics, 59.1% had no previous eye evaluation. Impaired vision due to cataracts was 24.0 % |

|                                       |                                              |                             |                                                              |                    |                                                                                                                                                                                                                                                                                  |                                                                                                                                                                                                                                                                                                                                                                                       |
|---------------------------------------|----------------------------------------------|-----------------------------|--------------------------------------------------------------|--------------------|----------------------------------------------------------------------------------------------------------------------------------------------------------------------------------------------------------------------------------------------------------------------------------|---------------------------------------------------------------------------------------------------------------------------------------------------------------------------------------------------------------------------------------------------------------------------------------------------------------------------------------------------------------------------------------|
|                                       |                                              |                             |                                                              |                    |                                                                                                                                                                                                                                                                                  | representing a 40% decline in a decade.                                                                                                                                                                                                                                                                                                                                               |
| <b>Ashanti</b>                        | Annani-Akollor et al. 2019 <sup>41</sup>     | Adults 18 years or above    | Ghanian T2DM adults at Kmofo Anokye Teaching hospital (KATH) | 1,600              | NA                                                                                                                                                                                                                                                                               | The prevalence of macrovascular and microvascular complications of T2DM was 31.8% and 35.3% respectively. The prevalence of neuropathy, nephropathy, retinopathy, sexual dysfunction, diabetic ketoacidosis (DKA), and hypoglycemia were 20.8%, 12.5%, 6.5%, 3.8%, 2.0%, and 0.8% respectively. The prevalence of single, double, and multiple complications are 59%, 16.3%, and 1.5% |
| <b>Ashanti</b>                        | Hayfron - Benjamin et al. 2019 <sup>37</sup> | Adults aged 25-70 years old | Ghanaian adult T2DM population (206 in Ghana) aged >25 years | 650                | Nephropathy based on report from Joint Committee on Diabetic Nephropathy; PAD based on AHA 2012; coronary artery disease (CAD) was assessed using the WHO Rose angina questionnaire; Retinopathy, possible myocardial infarction, angina, and stroke were based on questionnaire | Microvascular and macrovascular complications rates were higher in non-migrant Ghanaians than in migrant Ghanaians (nephropathy 32.0% vs. 19.8%; PAD 11.2% vs. 3.4%; CAD 18.4% vs. 8.3%; and stroke 14.5% vs. 5.6%), except for self-reported retinopathy (11.0% vs. 21.6%)                                                                                                           |
| <b>Other (Depression and Anaemia)</b> |                                              |                             |                                                              |                    |                                                                                                                                                                                                                                                                                  |                                                                                                                                                                                                                                                                                                                                                                                       |
| <b>Region</b>                         | <b>Author and date</b>                       | <b>Target population</b>    | <b>Context</b>                                               | <b>Sample size</b> | <b>Diagnostic criteria</b>                                                                                                                                                                                                                                                       | <b>Main results</b>                                                                                                                                                                                                                                                                                                                                                                   |

| <b>Greater Accra</b>         | Akpalu et al. 2018 <sup>31</sup>       | Adults aged 30-65 years old | Patients recruited at the National Diabetes Management and Research Centre, Korle Bu Teaching Hospital, Accra, Ghana | 400                | Patient Health Questionnaire-9 (PHQ-9)                                                                                                                                                                            | The prevalence of depression was 31.3% among T2DM patients. Female gender, being unmarried, frequent intake of alcohol, previous smoking status and insulin use were associated with increased odds of depression, whereas being educated above basic school level was associated with decreased odds of depression. |
|------------------------------|----------------------------------------|-----------------------------|----------------------------------------------------------------------------------------------------------------------|--------------------|-------------------------------------------------------------------------------------------------------------------------------------------------------------------------------------------------------------------|----------------------------------------------------------------------------------------------------------------------------------------------------------------------------------------------------------------------------------------------------------------------------------------------------------------------|
| <b>NA</b>                    | Antwi-Bafour et al. 2016 <sup>20</sup> | NA                          | 50 control and 50 diabetic cases                                                                                     | 100                | NA                                                                                                                                                                                                                | Of the patients with diabetes, 84.8 % had a haemoglobin concentration (incidence) that was significantly less (males 11.16±1.83 and females 10.41±1.49) than the controls (males 14.25±1.78 and females 12.53±1.14).                                                                                                 |
| <b>Dry eye disease (DED)</b> |                                        |                             |                                                                                                                      |                    |                                                                                                                                                                                                                   |                                                                                                                                                                                                                                                                                                                      |
| <b>Region</b>                | <b>Author and date</b>                 | <b>Target population</b>    | <b>Context</b>                                                                                                       | <b>Sample size</b> | <b>Diagnostic criteria</b>                                                                                                                                                                                        | <b>Main results</b>                                                                                                                                                                                                                                                                                                  |
| <b>Central</b>               | Abu et al 2022 <sup>51</sup>           | Adults aged 38-85 years old | Diabetic patients attending Cape Coast Teaching Hospital                                                             | 311                | Diabetes was based on the American Diabetes association. DED Clinical assessment included meibum expressibility and quality, Schirmer test 1, tear breakup time (TBUT), ocular surface staining, and blink rates. | Prevalence of DED was 72.3%                                                                                                                                                                                                                                                                                          |

384  
385  
386



### 387 **3) Economic burden**

388 Only one study reported on the economic burden of diabetes, assessing the financial  
389 cost of diabetes management (from a provider perspective) in cocoa clinics in  
390 Greater Accra, Ashanti, and Eastern regions<sup>25</sup>. Bottom-up micro costing was used to  
391 estimate the costs. The mean annual financial cost of managing one diabetic case at  
392 the outpatient clinics was estimated at GHS 540.3 (2021 US \$194.09). The costs  
393 were broken down between service costs (22%) and direct medical costs (78%).  
394 Drug costs accounted for 71% of the direct medical costs. The cost of hospitalization  
395 per patient-day at clinics was estimated at GHS 32.78 (2021 US\$ 11.78). The total  
396 annual financial cost of diabetes management accounted for 8% of the total annual  
397 expenditure of the clinics.

398

## 399 **Discussion**

400

401 This scoping review reveals that there is paucity of literature on the burden of diabetes  
402 in Ghana. We divided the burden into three forms (themes): epidemiological burden  
403 (prevalence and incidence of diabetes); health outcomes (mortality, diabetes  
404 complications and comorbidity); and economic burden (cost of illness to the patients  
405 and health system). Most of the existing Ghana centred literature focuses on the  
406 prevalence of diabetes, including its complications and comorbidities. There is sparse  
407 data on the economic burden of the disease in Ghana. This review did not find any  
408 study that used generic health outcome measures such as DALYs or QALYs to  
409 estimate the diabetes burden. The existing literature is skewed towards a few  
410 particularly Ashanti, leaving some geographical regions of Ghana without any  
411 reporting (including, for example, Upper East, and Upper West regions).



412

413 Out of the identified studies, 36 studies focused on the prevalence of diabetes and  
414 associated complications; only one study reported economic-related findings,  
415 indicating a need for more costing studies, important also to support the development  
416 of economic evaluations. All diabetes studies were either on T2D or referred to  
417 diabetes generally without specifying the type. No studies explicitly targeting T1D were  
418 found. Our findings suggest important gaps in the Ghanaian scientific literature, and  
419 the need for further research to characterise the burden of diabetes in the country.

420

421 The national prevalence of diabetes in Ghana was reported in the studies to be  
422 between 2.80% and 3.95%<sup>22–24</sup>. The reported national prevalence of diabetes (2.8-%  
423 to 3.95%) is below the sub-Saharan Africa regional average of 4.5%<sup>3</sup>. However,  
424 studies that reported on prevalence sub-nationally provided substantially higher  
425 estimates; for example in Western, Ashanti, and Central regions, diabetes prevalence  
426 was reported to be 39.8%<sup>38</sup>, 25.2%<sup>48</sup> 24.6%<sup>38</sup> respectively. Despite Ghana having  
427 seemingly lower levels of prevalence of diabetes at a national level in comparison to  
428 the SSA average, there remains an urgent need to put in place interventions to  
429 address these regional differences, and stem any further anticipated rise in disease  
430 burden<sup>3</sup>. The within-country regional variations call for a more targeted approach when  
431 implementing diabetes interventions.

432

433 Diabetes in Ghana was found to be more prevalent among women compared to  
434 men<sup>22–24,30</sup>. This is in line with the recently reported prevalence in SSA by International  
435 Diabetes Federation<sup>3</sup> and other studies<sup>52,53</sup>. Systematic reviews have found that  
436 women were more likely to have diabetes [odds ratio 1.65 (95% CI 1.43, 1.91)], and

437 less likely to have glycaemic control than men. It has been argued that relative  
438 differences in physical activity between men and women may be a factor<sup>52</sup>. There was  
439 an urban-rural divide in the prevalence of diabetes in Ghana where urban areas were  
440 reported to have a higher prevalence compared to the rural areas<sup>22–24,39,40</sup>. This finding  
441 is consistent with other studies done in India (prevalence of 15.0% and 19.0% in rural  
442 and urban areas respectively in the year 2015-2019)<sup>54</sup>, and Myanmar (prevalence of  
443 7.1% and 12.1% in rural and urban areas respectively in year 2013/2014)<sup>55</sup>. This has  
444 been attributed to differences in dietary habits and levels of physical activity between  
445 urban and rural areas.

446

447 Hypertension and metabolic syndrome were among the most prevalent comorbidities  
448 of diabetic patients in Ghana. Hypertension prevalence was highest in the Greater  
449 Accra region (36.60% of diabetic patients)<sup>32</sup>. Metabolic syndrome is a cluster of  
450 conditions that include combinations of hypertension, central obesity, insulin  
451 resistance, or atherogenic dyslipidaemia<sup>56</sup>. The two main risk factors of metabolic  
452 syndrome are the increase in consumption of high-calorie, low-fibre fast food and a  
453 decrease in physical activity which may be linked to mechanized transportation and a  
454 sedentary form of leisure time activities. These are the same established behavioural  
455 risk factors for diabetes and obesity that are typically predominant in urban areas.  
456 Without treatment, diabetes, high blood pressure, and obesity can damage blood  
457 vessels, leading to micro and macrovascular complications, which can occur  
458 concurrently. The highest prevalence of metabolic syndrome was reported in the  
459 Ashanti region where it was reported to range from 59 to 90% among diabetic  
460 patients<sup>42,43</sup>.

461

462 Our results also align well with the Institute of Health Metrics and Evaluation (IHME)  
463 assessment of the trend of disease burden in Ghana. Notably, in the year 2000,  
464 diabetes was not within the top 10 disease groups in terms of burden of disease. By  
465 2019 diabetes had moved up to eighth position and was linked to more than 2,157  
466 DALYs per 100,000 people. Cardiovascular diseases, which are often complications  
467 of diabetes and metabolic syndrome, were ranked first in 2019, causing an estimated  
468 6,216 DALYs per 100,000 population<sup>57</sup>. This evidence points to the rapid rise of  
469 diabetes, cardiovascular diseases and other NCDs, linked with common genetic,  
470 metabolic, and behavioural risk factors. The ranking also suggests that there is a  
471 gradual receding of communicable diseases in the last 2 decades compared to NCDs.  
472 Combined, diabetes and cardiovascular diseases is linked to more than 8,300 DALYs  
473 per 100,000 people in Ghana, representing a significant proportion (12.6%) of the total  
474 disease burden in the country<sup>57</sup>.

475

476 Literature on the economic burden of diabetes in Ghana is very limited with only one  
477 study reporting on the burden. This finding is in line with the study by Hollingworth et  
478 al. (2020) that looked at available localised information to support HTA in Ghana noting  
479 that there were few accessible data sources for costs and resource utilisation  
480 generally<sup>9</sup>. Relatedly, we found a falling off in the number of studies published after  
481 2019, although that may reflect the impact of the COVID-19 pandemic on research  
482 and publication choices within the country and globally

483

#### 484 **Policy implications**

485 Our review provides some evidence of the situation in Ghana, and associated  
486 information gaps, consistent with studies focused on other African countries<sup>58</sup>. We find

487 that Ghana is faced with a rising prevalence of diabetes and cardiovascular disorders  
488 with potentially important regional differences in disease burden. To address this  
489 challenge, there is a need to understand the contextual factors driving the rise and the  
490 likely causes behind the existing regional variations in the reported burden.

491  
492 Unlike communicable diseases, NCDs are usually chronic in nature and exhibit a  
493 progressive disease course. A person may develop more than one NCD at a time,  
494 fuelling disease progression even further<sup>59,60</sup>. NCDs constitute a long-term burden not  
495 only to the patient and carers, but also to the healthcare system and the economy.  
496 Currently, NCDs do not attract as much development assistance funds as  
497 communicable diseases such as HIV, tuberculosis and malaria, and Ghana which is  
498 currently classed as a middle-income country is no longer eligible for some  
499 development assistance grants. Therefore, there is a need for Ghana, as well as  
500 countries, to ensure that available domestic resources for health can be used as  
501 efficiently as possible to address this growing burden. Typically, this involves  
502 operationalising and institutionalising proven priority-setting processes.

503  
504 HTA can be applied to both treatments for NCDs, such as insulin analogues for the  
505 management of diabetes, and also to interventions that seek to reduce disease  
506 prevalence and incidence in the first place. On the latter this could include identifying  
507 cost-effective interventions to tackle the common NCD risk factors shared by diabetes  
508 and other comorbidities such as cardiovascular diseases, obesity, or metabolic  
509 syndrome to reduce the burden of diabetes in the country. This may require stronger  
510 prevention approaches<sup>61</sup> targeting high risk individuals or whole populations, which  
511 aim to increase physical activity and promote a healthy diet while also monitoring

512 obesity levels. This would be especially important in urban communities in Ghana  
513 where the burden appears higher than the national average.

514

515 Institutionalising HTA for localised decision making requires that relevant data sources  
516 are available, and that may mean developing a strategy to address key informational  
517 gaps as part of building any HTA system. There was a scarcity of evidence on the  
518 economic burden of diabetes in Ghana, and there were no estimates available of the  
519 burden of disease for a number of regions. A key issue is the lack of diabetes incidence  
520 data: as previously reported<sup>9</sup>, the Ghana Health and Demographic Surveillance  
521 Systems (GHDSS) could potentially be a valuable source of such information, and the  
522 Ministry of Health and other stakeholders could consider enhancing their operation in  
523 this space, for diabetes as well as other NCDs. It may also mean better leveraging  
524 already existing data sources, such as from the National Health Insurance Scheme<sup>9</sup>.

525

## 526 **Limitations**

527 The scoping review did not include an appraisal of the quality of included studies.  
528 According to Arksey and O'Malley's (2005) framework, the study quality is not  
529 assessed during scoping reviews, but rather in systematic reviews that aim to address  
530 specific questions relating to feasibility, appropriateness, meaningfulness or  
531 effectiveness of a certain treatment or practice. The exploratory nature of our study  
532 about the burden of diabetes made the scoping review methodology suitable.

533

534 The included studies used different diagnostic criteria for diabetes including WHI  
535 criteria, American Diabetes Association and self-reporting. Self-reported diabetes  
536 can be misleading because some of the people involved in the studies may not have

537 received a diagnosis and thus report as not having the diabetes. This may have  
538 underestimated the prevalence of diabetes in the country or region.

539

540 This study has used an older geographical classification system for the administrative  
541 regions in Ghana. The sub-national regions of Ghana constitute the first level of  
542 subnational government administration within the country. From 1987, Ghana had ten  
543 officially established regional boundaries. In 2018, a referendum on the creation of six  
544 new regions was held and the overall number were later increased to 16. We used the  
545 older system of 10 regions based on the available literature which mostly reported  
546 within that classification system. However, we expect that there would be no  
547 substantial differences had the newer system been applied, since all new regional  
548 divisions stem from the partitioning of regions where no studies were found (e.g, Brong  
549 Ahafo and Northern regions).

550

## 551 **Conclusion**

552

553 Ghana is faced with a considerable burden of diabetes which varies by geographical  
554 region and setting (rural/urban). It is urgent to tackle the growing challenge to mitigate  
555 the likely enormous burden and cost of the disease. Despite the existing regional  
556 variation of the burden of diabetes, there is a paucity of literature in some regions (for  
557 example Eastern, Western, Upper East, Upper West, and Brong Ahafo). There is  
558 therefore a need for further research to understand the burden (epidemiological, health  
559 outcomes and economic) of diabetes in these regions in order to inform the NCD  
560 prevention and management policies in the country.

561

562

563

## 564 **Declaration**

565

## 566 **Ethics approval and consent to participate**

567 The study utilised secondary data/literature that is publicly available and did not use  
568 any personal or private data.

569

## 570 **Consent for publication**

571 Not applicable

572

## 573 **Availability of data and materials**

574 The extracted data analysed during the current study is available from the  
575 corresponding author upon reasonable request.

576

## 577 **Competing interests**

578 The authors declare that they have no competing interests

579

## 580 **Funding**

581 This study was supported by the International Decision Support Initiative, which is  
582 funded by the Bill and Melinda Gates Foundation (OPP1202541).

583

584

## 585 **Role of funder**

586 The funder of the study had no role in study design, data collection, data analysis,  
587 data interpretation, or writing of the report. Funders supported researcher time and  
588 other resources (such as computer equipment) needed for completion of the study.

589

590

## 591 **Authors contributions**

592 Conceptualisation: – MG, JK, FR

593 Developing and carrying out search strategy: – MG

594 Screening of articles: – MG, JK

595 Data extraction, and quality assessment: – MG, JK

596 Validation: – STR

597 Data curation and analysis: – MG, JK

598 Funding acquisition: – FR

599 Methodology: – MG, JK,

600 Project administration: – MG, JK, IA, GG, RO, EAK

601 Supervision: – FR, AV

602 Writing – original draft: – MG, JK,

603 writing review & editing: – MG, JK, RO, EAK, GG, IA, FR, STR, AV

604

## 605 **Acknowledgements**

606 None

607  
608  
609  
610  
611  
612  
613  
614  
615  
616  
617  
618  
619  
620  
621  
622  
623  
624  
625  
626  
627  
628  
629  
630  
631  
632  
633  
634  
635  
636  
637  
638  
639  
640  
641  
642  
643  
644  
645  
646  
647  
648  
649  
650  
651  
652  
653  
654  
655

## References

1. World Health Organization. Noncommunicable diseases: Mortality. Published 2022. Accessed December 28, 2022. <https://www.who.int/data/gho/data/themes/topics/topic-details/GHO/ncd-mortality>
2. International Diabetes Federation. Facts & figures. Published December 9, 2021. Accessed December 28, 2022. <https://www.idf.org/aboutdiabetes/what-is-diabetes/facts-figures.html>
3. International Diabetes Federation. *IDF Diabetes Atlas | Tenth Edition.*; 2021. Accessed December 29, 2022. <https://diabetesatlas.org/>
4. World Health Organization. ICD-11 for Mortality and Morbidity Statistics: 5A10 Type 1 diabetes mellitus. Published February 2022. Accessed December 28, 2022. <https://icd.who.int/browse11/l-m/en#http%3A%2F%2Fid.who.int%2Ficd%2Fentity%2F1651053999>
5. World Health Organization. ICD-11 for Mortality and Morbidity Statistics: 5A11 Type 2 diabetes mellitus. Published February 2022. Accessed December 28, 2022. <https://icd.who.int/browse11/l-m/en#/http%253a%252f%252fid.who.int%252ficd%252fentity%252f119724091>
6. International Diabetes Federation. What is diabetes. Published July 7, 2022. Accessed December 28, 2022. <https://www.idf.org/aboutdiabetes/what-is-diabetes.html>
7. Siegfried N, Wilkinson T, Hofman K. Where from and where to for health technology assessment in South Africa? A legal and policy landscape analysis. *South African Heal Rev*. Published online 2017:41. Accessed March 1, 2023. [https://www.hst.org.za/publications/South African Health Reviews/4\\_Where from and where to for health technology assessment in South Africa.pdf](https://www.hst.org.za/publications/South African Health Reviews/4_Where from and where to for health technology assessment in South Africa.pdf)
8. O'Rourke B, Oortwijn W, Schuller T. The new definition of health technology assessment: A milestone in international collaboration. *Int J Technol Assess Health Care*. 2020;36(3):187-190. doi:10.1017/S0266462320000215
9. Hollingworth SA, Downey L, Ruiz FJ, et al. What do we need to know? Data sources to support evidence-based decisions using health technology assessment in Ghana. *Heal Res Policy Syst*. 2020;18(1):1-12. doi:10.1186/S12961-020-00550-8/TABLES/2
10. Ghana Web. MOH launches Ghana's strategy for Health Technology Assessment document. Accessed January 18, 2023. <https://www.ghanaweb.com/GhanaHomePage/NewsArchive/MOH-launches-Ghana-s-strategy-for-Health-Technology-Assessment-document-1324405>
11. Ghana M of H. *Ghana Health Technology Assessment Process Guide.*; 2022.
12. Ministry of Health. Ghana National Policy on Non Communicable Diseases. Published March 2022. Accessed January 28, 2023. <https://www.moh.gov.gh/wp-content/uploads/2022/05/Ghana-NCD-Policy-2022.pdf>
13. Arksey H, O'Malley L. Scoping studies: Towards a methodological framework. *Int J Soc Res Methodol Theory Pract*. 2005;8(1):19-32. doi:10.1080/1364557032000119616
14. Tricco AC, Lillie E, Zarin W, et al. PRISMA Extension for Scoping Reviews



- 656 (PRISMA-ScR): Checklist and Explanation. *Ann Intern Med.* 2018;169(7):467.  
657 doi:10.7326/M18-0850
- 658 15. Veritas Health Innovation. Covidence systematic review software. Accessed  
659 December 31, 2021. <https://www.covidence.org/>
- 660 16. Sarfo FS, Mobula LM, Plange-Rhule J, Ansong D, Ofori-Adjei D. Incident  
661 stroke among Ghanaians with hypertension and diabetes: A multicenter,  
662 prospective cohort study. *J Neurol Sci.* 2018;395:17-24.  
663 doi:10.1016/j.jns.2018.09.018
- 664 17. Sarfo-Kantanka O, Sarfo FS, Ansah EO, Eghan B, Ayisi-Boateng NK,  
665 Acheamfour-Akokuwah E. Secular trends in admissions and mortality rates from  
666 diabetes mellitus in the central belt of Ghana: A 31-year review. *PLoS One.*  
667 2016;11(11). doi:10.1371/journal.pone.0165905
- 668 18. Sarfo-Kantanka O, Sarfo FS, Kyei I, Agyemang C, Mbanaya JC. Incidence and  
669 determinants of diabetes-related lower limb amputations in Ghana, 2010-2015  
670 - A retrospective cohort study. *BMC Endocr Disord.* 2019;19(1):1-8.  
671 doi:10.1186/S12902-019-0353-8/TABLES/3
- 672 19. Sarfo-Kantanka O, Kyei I, Mbanaya JC, Owusu-Ansah M. Diabetes-related foot  
673 disorders among adult Ghanaians. *Diabet FOOT & ANKLE.* 2018;9(1).  
674 doi:10.1080/2000625X.2018.1511678
- 675 20. Antwi-Bafour S, Hammond S, Adjei JK, Kyeremeh R, Martin-Odoom A, Ekem  
676 I. A case-control study of prevalence of anemia among patients with type 2  
677 diabetes. *J Med Case Rep.* 2016;10(1):1-8. doi:10.1186/S13256-016-0889-  
678 4/TABLES/6
- 679 21. Quaicoe P, Takramah W, Axame WK, et al. ASSOCIATED RISK FACTORS  
680 OF TYPE 2 DIABETES MELLITUS AMONG ADULTS IN THE HOHOE  
681 MUNICIPALITY OF GHANA. *Int J of Medical Res Pharm Sci.* 2017;4(5):35-48.  
682 doi:10.5281/ZENODO.581010
- 683 22. Gatimu SM, Milimo BW, Sebastian MS. Prevalence and determinants of  
684 diabetes among older adults in Ghana. *BMC Public Health.* 2016;16(1):1-12.  
685 doi:10.1186/s12889-016-3845-8
- 686 23. Yorke E, Tetteh J, Boima V, Yawson AE. High BMI: an important health risk  
687 factor among older adults in Ghana. *Public Health Nutr.* 2021;24(14):4522-  
688 4529. doi:10.1017/S1368980020003717
- 689 24. Tarekegne FE, Padyab M, Schrodgers J, Williams JS. Sociodemographic and  
690 behavioral characteristics associated with self-reported diagnosed diabetes  
691 mellitus in adults aged 50+ years in Ghana and South Africa: results from the  
692 WHO-SAGE wave 1. *BMJ OPEN DIABETES Res & CARE.* 2018;6(1).  
693 doi:10.1136/bmjdr-2017-000449
- 694 25. Quaye EA, Amporful EO, Akweongo P, Aikins MK. Analysis of the Financial  
695 Cost of Diabetes Mellitus in Four Cocoa Clinics of Ghana. *Value Heal Reg*  
696 *issues.* 2015;7:49-53. doi:10.1016/J.VHRI.2015.08.005
- 697 26. Bawah AT, Ngambire LT, Abaka-Yawson A, Anomah A, Kinanyok S, Tornyi H.  
698 A community based prevalence of type 2 diabetes mellitus in the Ho  
699 municipality of Ghana. *J PUBLIC Heal.* 2021;29(2):403-409.  
700 doi:10.1007/s10389-019-01144-7
- 701 27. Osei-Yeboah J, Owiredu WKBA, Norgbe GK, et al. The Prevalence of  
702 Metabolic Syndrome and Its Components among People with Type 2 Diabetes  
703 in the Ho Municipality, Ghana: A Cross-Sectional Study. *Int J Chronic Dis.*  
704 2017;2017:1-8. doi:10.1155/2017/8765804

- 705 28. Tuglo LS, Nyande FK, Agordoh PD, et al. Knowledge and practice of diabetic  
706 foot care and the prevalence of diabetic foot ulcers among diabetic patients of  
707 selected hospitals in the Volta Region, Ghana. *Int Wound J.* 2022;19(3):601-  
708 614. doi:10.1111/IWJ.13656
- 709 29. Ellahi B, Dikmen D, Seyhan-Erdoğan B, et al. Prevalence, risk factors, and  
710 self-awareness for hypertension and diabetes: rural–urban and male–female  
711 dimensions from a cross-sectional study in Ghana. *Int J Diabetes Dev Ctries.*  
712 Published online November 29, 2022:1-15. doi:10.1007/S13410-022-01141-  
713 9/TABLES/7
- 714 30. Vuvor F, Steiner-Asiedu M, Armar-Klemesu M, Armah S. Population-based  
715 study of diabetic mellitus prevalence and its associated factors in adult  
716 Ghanaians in the greater Accra region. *Int J Diabetes Dev Ctries.*  
717 2011;31(3):149-153. doi:10.1007/s13410-011-0035-1
- 718 31. Akpalu J, Yorke E, Ainuson-Quampah J, Balogun W, Yeboah K. Depression  
719 and glycaemic control among type 2 diabetes patients: a cross-sectional study  
720 in a tertiary healthcare facility in Ghana. *BMC Psychiatry.* 2018;18.  
721 doi:10.1186/s12888-018-1933-2
- 722 32. Nimako BA, Baiden F, Sackey SO, Binka F. Multimorbidity of chronic diseases  
723 among adult patients presenting to an inner-city clinic in Ghana. *Global Health.*  
724 2013;9. doi:10.1186/1744-8603-9-61
- 725 33. Gato WE, Acquah S, Apenteng BA, Opoku ST, Boakye BK. Diabetes in the  
726 Cape Coast metropolis of Ghana: an assessment of risk factors, nutritional  
727 practices and lifestyle changes. *Int Health.* 2017;9(5):310-316.  
728 doi:10.1093/inthealth/ihx028
- 729 34. Mogre V, Salifu ZS, Abedandi R. Prevalence, components and associated  
730 demographic and lifestyle factors of the metabolic syndrome in type 2 diabetes  
731 mellitus. *J Diabetes Metab Disord.* 2014;13(1):80. doi:10.1186/2251-6581-13-  
732 80
- 733 35. Abagre TA, Bandoh DA, Addo-Lartey AA. Determinants of metabolic syndrome  
734 among patients attending diabetes clinics in two sub-urban hospitals: Bono  
735 Region, Ghana. *BMC Cardiovasc Disord.* 2022;22(1):1-13.  
736 doi:10.1186/S12872-022-02805-4/TABLES/4
- 737 36. Tyrovolas S, Koyanagi A, Garin N, et al. Diabetes mellitus and its association  
738 with central obesity and disability among older adults: a global perspective.  
739 *Exp Gerontol.* 2015;64:70-77. doi:10.1016/J.EXGER.2015.02.010
- 740 37. Hayfron-Benjamin C, van den Born B-J, der Zee AH, et al. Microvascular and  
741 macrovascular complications in type 2 diabetes Ghanaian residents in Ghana  
742 and Europe: The RODAM study. *J Diabetes Complications.* 2019;33(8):572-  
743 578. doi:10.1016/j.jdiacomp.2019.04.016
- 744 38. Anderson AK. Prevalence of Anemia, Overweight/Obesity, and Undiagnosed  
745 Hypertension and Diabetes among Residents of Selected Communities in  
746 Ghana. *Int J Chronic Dis.* 2017;2017:1-7. doi:10.1155/2017/7836019
- 747 39. Chilunga FP, Henneman P, Meeks KAC, et al. Prevalence and determinants of  
748 type 2 diabetes among lean African migrants and non-migrants: the RODAM  
749 study. *J Glob Health.* 2019;9(2). doi:10.7189/jogh.09.020426
- 750 40. Agyemang C, Meeks K, Beune E, et al. Obesity and type 2 diabetes in sub-  
751 Saharan Africans - Is the burden in today's Africa similar to African migrants in  
752 Europe? The RODAM study. *BMC Med.* 2016;14. doi:10.1186/s12916-016-  
753 0709-0

- 754 41. Annani-Akollor ME, Addai-Mensah O, Fondjo LA, et al. Predominant  
755 Complications of Type 2 Diabetes in Kumasi: A 4-Year Retrospective Cross-  
756 Sectional Study at a Teaching Hospital in Ghana. *Medicina (Kaunas)*.  
757 2019;55(5). doi:10.3390/MEDICINA55050125
- 758 42. Nsiah K, Shang VO, Boateng KA, Mensah F. Prevalence of metabolic  
759 syndrome in type 2 diabetes mellitus patients. *Int J Appl Basic Med Res*.  
760 2015;5(2):133. doi:10.4103/2229-516X.157170
- 761 43. Agyemang-Yeboah F, Eghan BAJ, Annani-Akollor ME, Togbe E, Donkor S,  
762 Afranie BO. Evaluation of Metabolic Syndrome and Its Associated Risk Factors  
763 in Type 2 Diabetes: A Descriptive Cross-Sectional Study at the Komfo Anokye  
764 Teaching Hospital, Kumasi, Ghana. *Biomed Res Int*. 2019;2019.  
765 doi:10.1155/2019/4562904
- 766 44. Opere-Addo MNA, Osei FA, Buabeng KO, et al. Healthcare services utilisation  
767 among patients with hypertension and diabetes in rural Ghana. *African J Prim  
768 Heal Care Fam Med*. 2020;12(1):8. doi:10.4102/PHCFM.V12I1.2114
- 769 45. Lartey SY, Aikins AK. Visual impairment amongst adult diabetics attending a  
770 tertiary outpatient clinic. *Ghana Med J*. 2018;52(2):84.  
771 doi:10.4314/GMJ.V52I2.4
- 772 46. Atosona A, Larbie C. Prevalence and Determinants of Diabetic Foot Ulcers  
773 and Lower Extremity Amputations in Three Selected Tertiary Hospitals in  
774 Ghana. *J Diabetes Res*. 2019;2019. doi:10.1155/2019/7132861
- 775 47. Cook-Huynh M, Ansong D, Steckelberg RC, et al. PREVALENCE OF  
776 HYPERTENSION AND DIABETES MELLITUS IN ADULTS FROM A RURAL  
777 COMMUNITY IN GHANA. *Ethn I& Dis*. 2012;22(3):347-352.
- 778 48. Sarfo-Kantank O, Owusu-Dabo E, Adomako-Boateng F, Eghan B, Dogbe J,  
779 Bedu-Addo G. An assessment of prevalence and risk factors for hypertension  
780 and diabetes during world diabetes day celebration in Kumasi, Ghana. *East Afr  
781 J Public Health*. 2014;11(2):805-815. doi:10.4314/eajph.v11i2.
- 782 49. K AH, R A, E A-D, E M-ME. Prevalence and Risk Factors of Diabetes Mellitus  
783 Among the Inhabitants of Kumasi Metropolis. *Arch Clin Biomed Res*. 1(4):224-  
784 234. Accessed January 2, 2023. [http://www.fotunejournals.com/prevalence-  
785 and-risk-factors-of-diabetes-mellitus-among-the-inhabitants-of-kumasi-  
786 metropolis.html](http://www.fotunejournals.com/prevalence-and-risk-factors-of-diabetes-mellitus-among-the-inhabitants-of-kumasi-metropolis.html)
- 787 50. Anto EO, Frimpong J, Boadu WIO, et al. Prevalence of Cardiometabolic  
788 Syndrome and its Association With Body Shape Index and A Body Roundness  
789 Index Among Type 2 Diabetes Mellitus Patients: A Hospital-Based Cross-  
790 Sectional Study in a Ghanaian Population. *Front Clin Diabetes Healthc*.  
791 2022;2:33. doi:10.3389/FCDHC.2021.807201
- 792 51. Abu EK, Ofori AO, Boadi-Kusi SB, et al. Dry eye disease and meibomian gland  
793 dysfunction among a clinical sample of type 2 diabetes patients in Ghana. *Afr  
794 Health Sci*. 2022;22(1):293. doi:10.4314/AHS.V22I1.36
- 795 52. Sobers-Grannum N, Murphy MM, Nielsen A, et al. Female Gender Is a Social  
796 Determinant of Diabetes in the Caribbean: A Systematic Review and Meta-  
797 Analysis. *PLoS One*. 2015;10(5):e0126799.  
798 doi:10.1371/JOURNAL.PONE.0126799
- 799 53. Zhang H, Ni J, Yu C, et al. Sex-based differences in diabetes prevalence and  
800 risk factors: A population-based cross-sectional study among low-income  
801 adults in China. *Front Endocrinol (Lausanne)*. 2019;10(SEP):658.  
802 doi:10.3389/FENDO.2019.00658/PDF

- 803 54. Ranasinghe P, Jayawardena R, Gamage N, Sivanandam N, Misra A.  
804 Prevalence and trends of the diabetes epidemic in urban and rural India: A  
805 pooled systematic review and meta-analysis of 1.7 million adults. *Ann*  
806 *Epidemiol.* 2021;58:128-148. doi:10.1016/J.ANNEPIDEM.2021.02.016  
807 55. Aung WP, Htet AS, Bjertness E, Stigum H, Chongsuvivatwong V, Kjøllesdal  
808 MKR. Urban–rural differences in the prevalence of diabetes mellitus among  
809 25–74 year-old adults of the Yangon Region, Myanmar: two cross-sectional  
810 studies. *BMJ Open.* 2018;8(3):e020406. doi:10.1136/BMJOPEN-2017-020406  
811 56. Huang PL. A comprehensive definition for metabolic syndrome. *DMM Dis*  
812 *Model Mech.* 2009;2(5-6):231-237. doi:10.1242/DMM.001180/-/DC1  
813 57. IHME. VizHub - GBD Compare. Accessed January 4, 2023.  
814 <https://vizhub.healthdata.org/gbd-compare/>  
815 58. Zorron Pu L, de Moura EG, Bernardo WM, et al. Analysis the significant risk  
816 factors on type 2 diabetes perspective of Bangladesh. *PLoS ONE [Electronic*  
817 *Resour.* 2018;13(1):1. doi:<https://dx.doi.org/10.1596/978-1-4648-0518-9>  
818 59. Alsaadon H, Afroz A, Karim A, et al. Hypertension and its related factors  
819 among patients with type 2 diabetes mellitus – a multi-hospital study in  
820 Bangladesh. *BMC Public Health.* 2022;22(1):1-10. doi:10.1186/S12889-022-  
821 12509-1/TABLES/2  
822 60. Tran PB, Kazibwe J, Nikolaidis GF, Linnosmaa I, Rijken M, van Olmen J.  
823 Costs of multimorbidity: a systematic review and meta-analyses. *BMC Med.*  
824 2022;20(1):1-15. doi:10.1186/S12916-022-02427-9/TABLES/1  
825 61. Zhou X, Siegel KR, Ng BP, et al. Cost-effectiveness of Diabetes Prevention  
826 Interventions Targeting High-risk Individuals and Whole Populations: A  
827 Systematic Review. *Diabetes Care.* 2020;43(7):1593-1616.  
828 doi:10.2337/DCI20-0018  
829  
830

## 831 Annex

### 832 833 Annex 1: Search strings

#### 834 835 Web of Science search

836  
837 Search link for Web of Science

838 [https://www.webofscience.com/wos/woscc/summary/55ba5b67-9492-4899-a3dd-  
839 8b2fe3588006-80f3249d/relevance/1](https://www.webofscience.com/wos/woscc/summary/55ba5b67-9492-4899-a3dd-8b2fe3588006-80f3249d/relevance/1)

840  
841 (TS=(Ghana)) AND TS=(Diabetes)

#### 842 843 PubMed search string

844 ("ghana"[MeSH Terms] OR "ghana"[All Fields] OR "ghana s"[All Fields]) AND  
845 ("diabete"[All Fields] OR "diabetes mellitus"[MeSH Terms] OR ("diabetes"[All Fields]  
846 AND "mellitus"[All Fields]) OR "diabetes mellitus"[All Fields] OR "diabetes"[All Fields]  
847 OR "diabetes insipidus"[MeSH Terms] OR ("diabetes"[All Fields] AND "insipidus"[All  
848 Fields]) OR "diabetes insipidus"[All Fields] OR "diabetic"[All Fields] OR "diabetics"[All  
849 Fields] OR "diabets"[All Fields])) AND (2021/4/4:2023/4/11[pdat])

#### 850 851 Embase search string

852 ('ghana'/exp OR ghana) AND ('diabetes mellitus'/exp OR 'diabetes mellitus')

853

854 **Scopus search string**

855 (TITLE-ABS-KEY ( ghana ) AND TITLE-ABS-KEY ( diabetes ) ) AND PUBYEAR >

856 2020 AND PUBYEAR < 2024

857



Figure 1: The HTA process

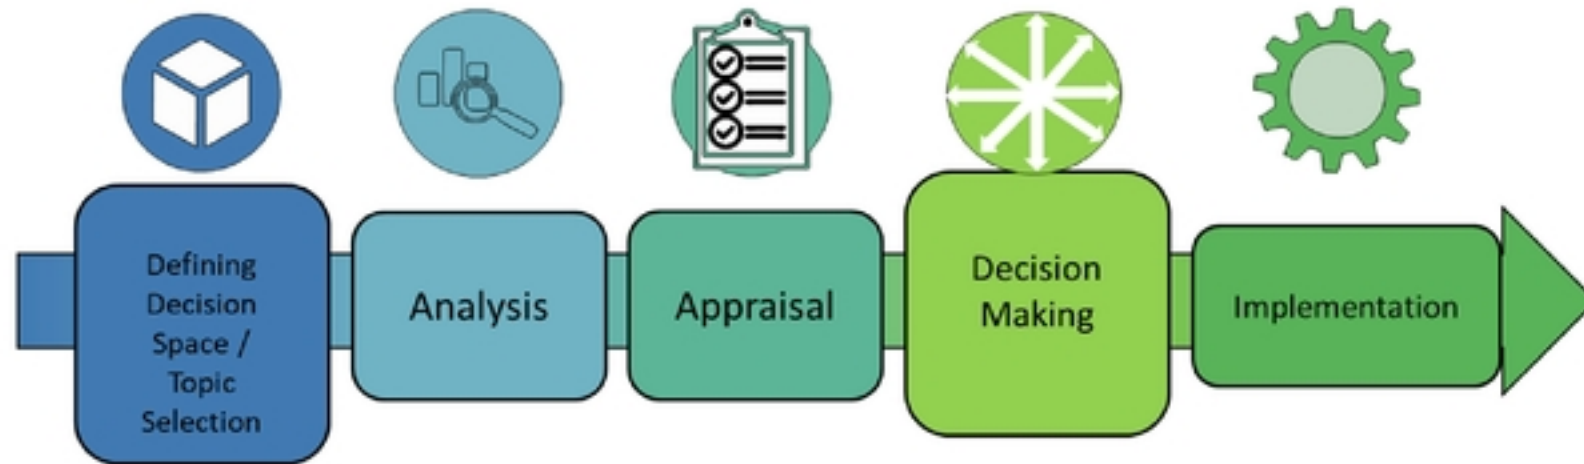

medRxiv preprint doi: <https://doi.org/10.1101/2023.04.19.23288806>; this version posted April 20, 2023. The copyright holder for this preprint (which was not certified by peer review) is the author/funder, who has granted medRxiv a license to display the preprint in perpetuity. It is made available under a [CC-BY 4.0 International license](#).

Figure 1: PRISMA flow chart

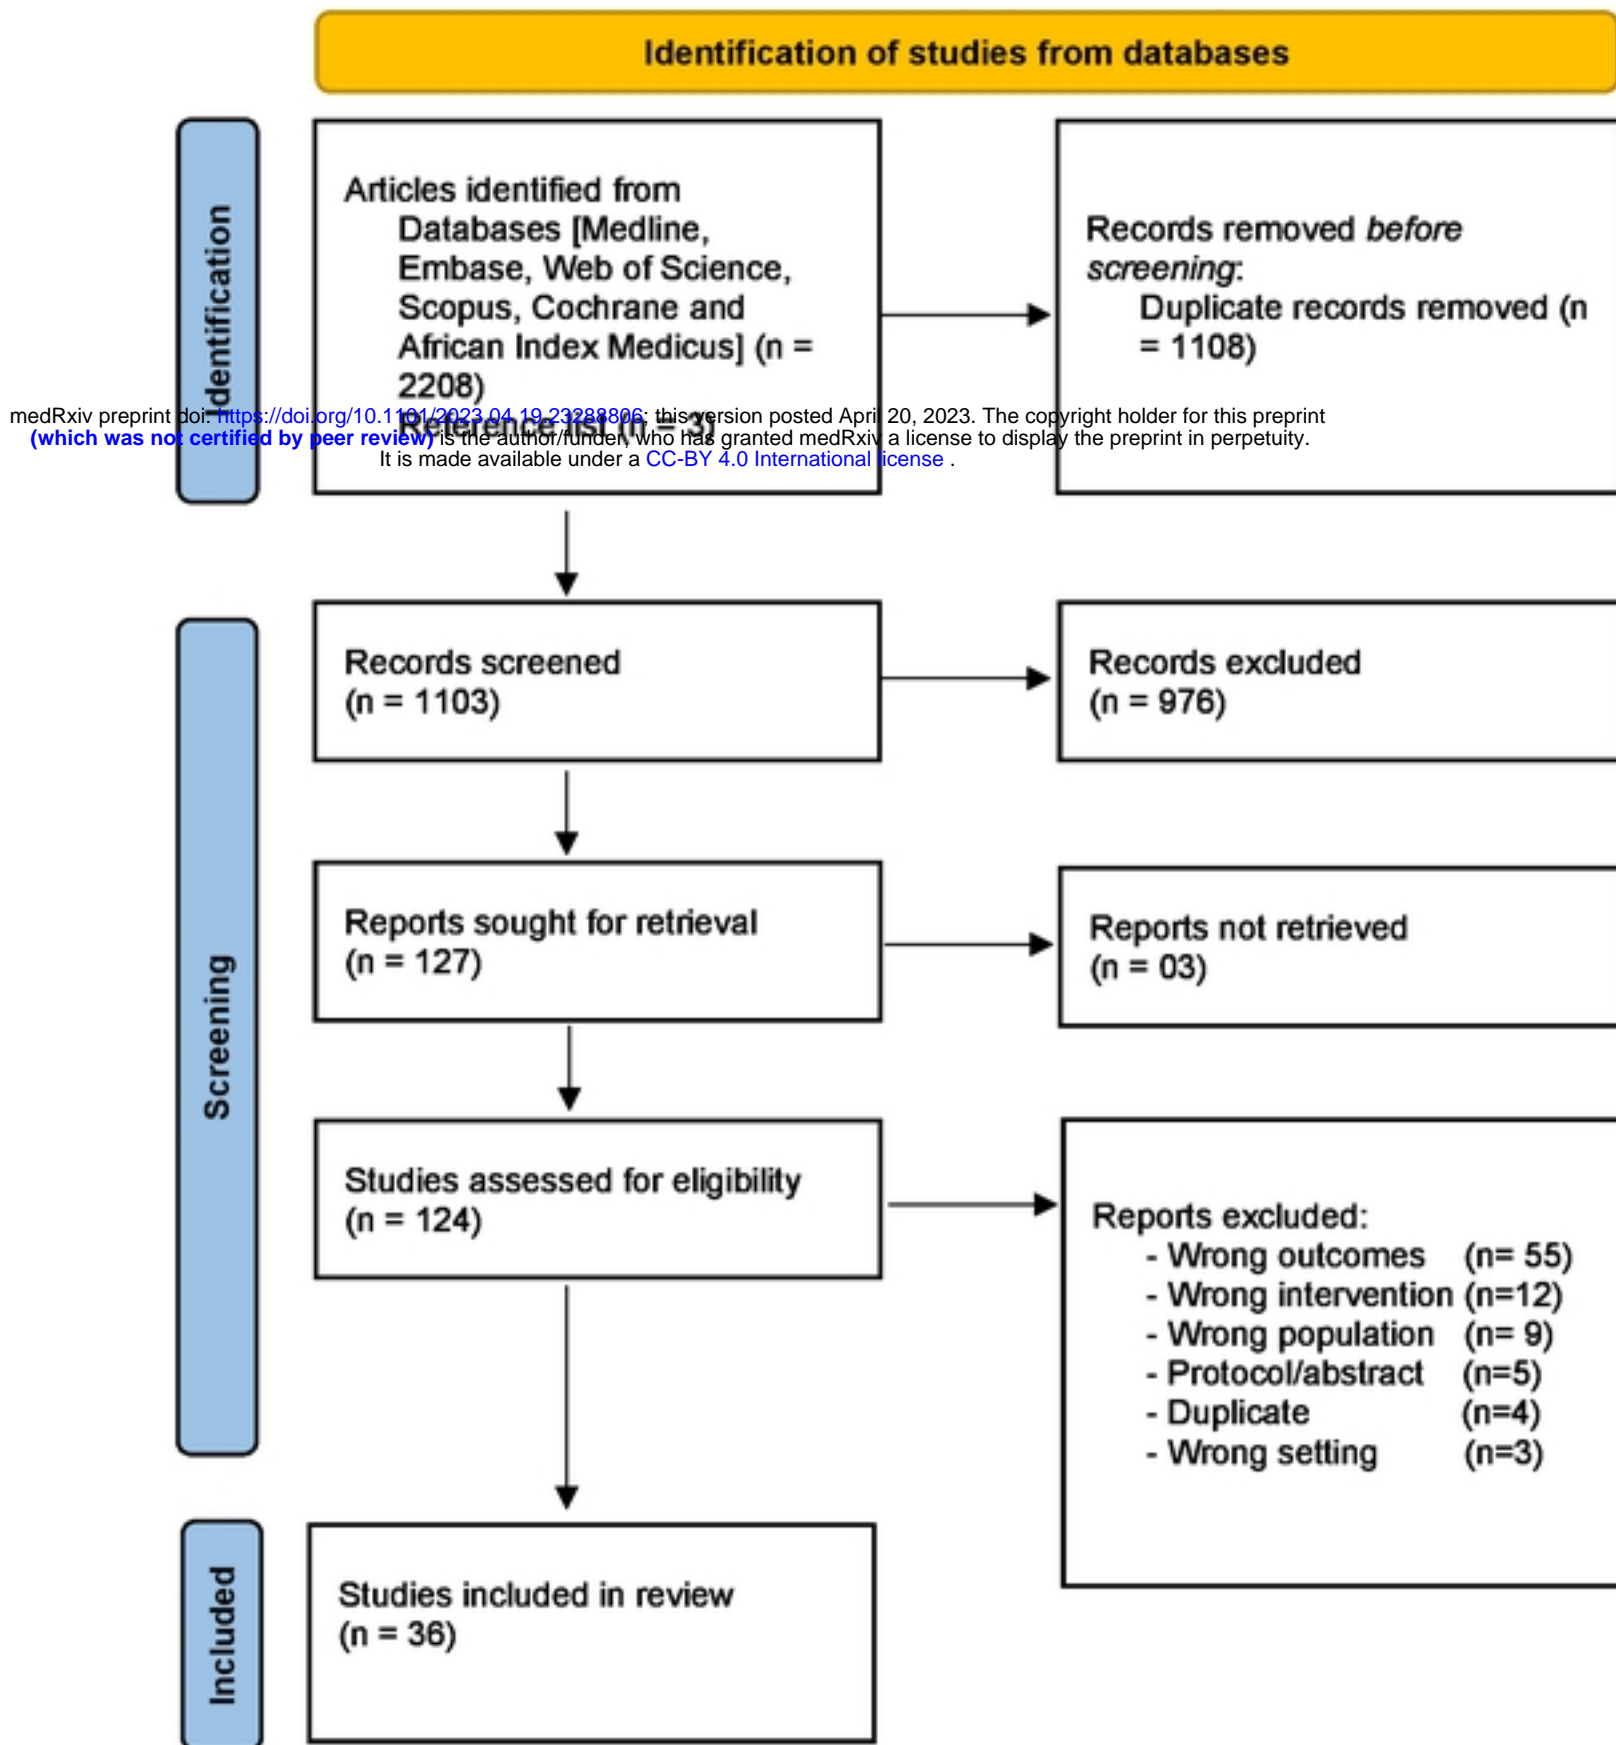

Adapted from: Page MJ, McKenzie JE, Bossuyt PM, Boutron I, Hoffmann TC, Mulrow CD, et al. The PRISMA 2020 statement: an updated guideline for reporting systematic reviews. *BMJ* 2021;372:n71. DOI: 10.1136/bmj.n71

**Figure 1: Number of studies/publications per year**

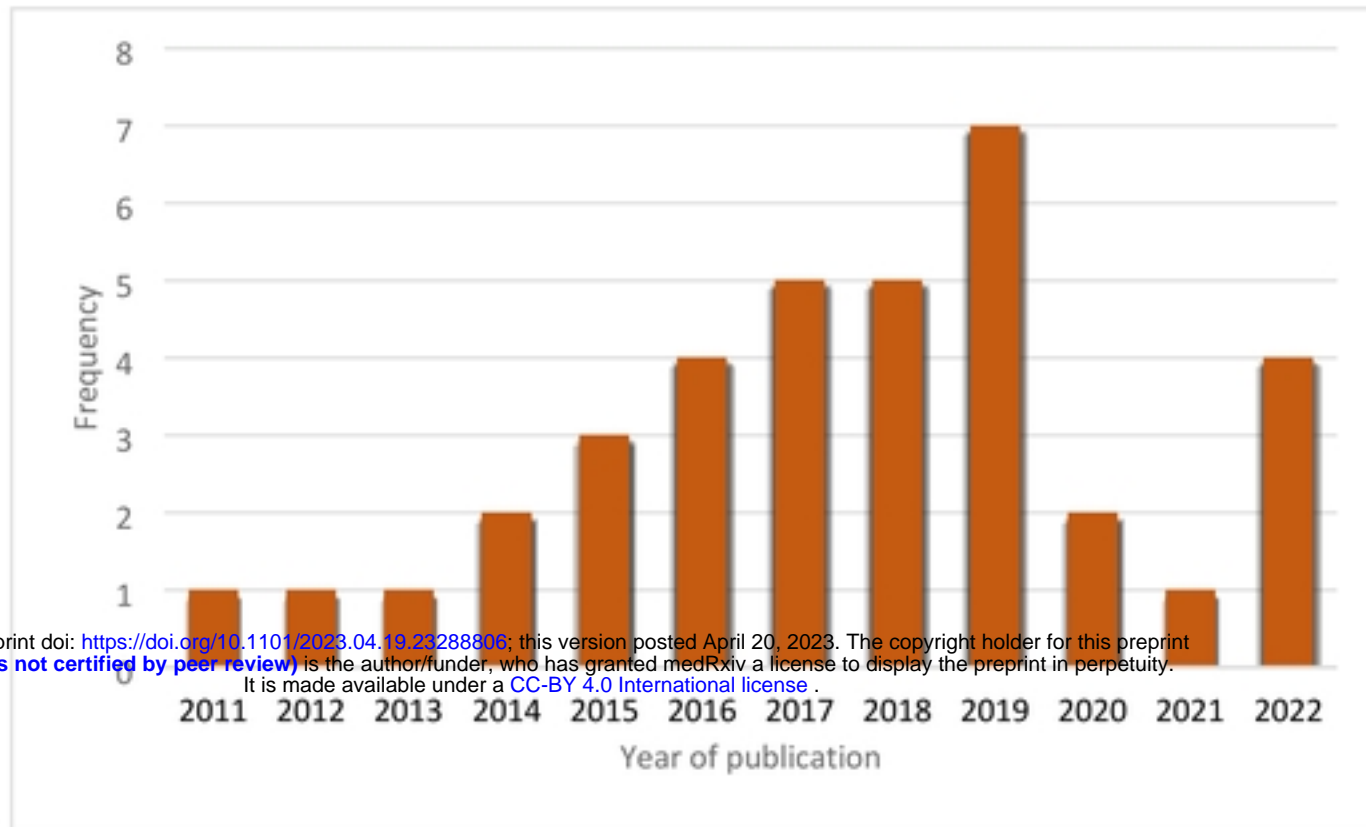



**Figure 1: Percentage of included studies by form of burden (theme)**

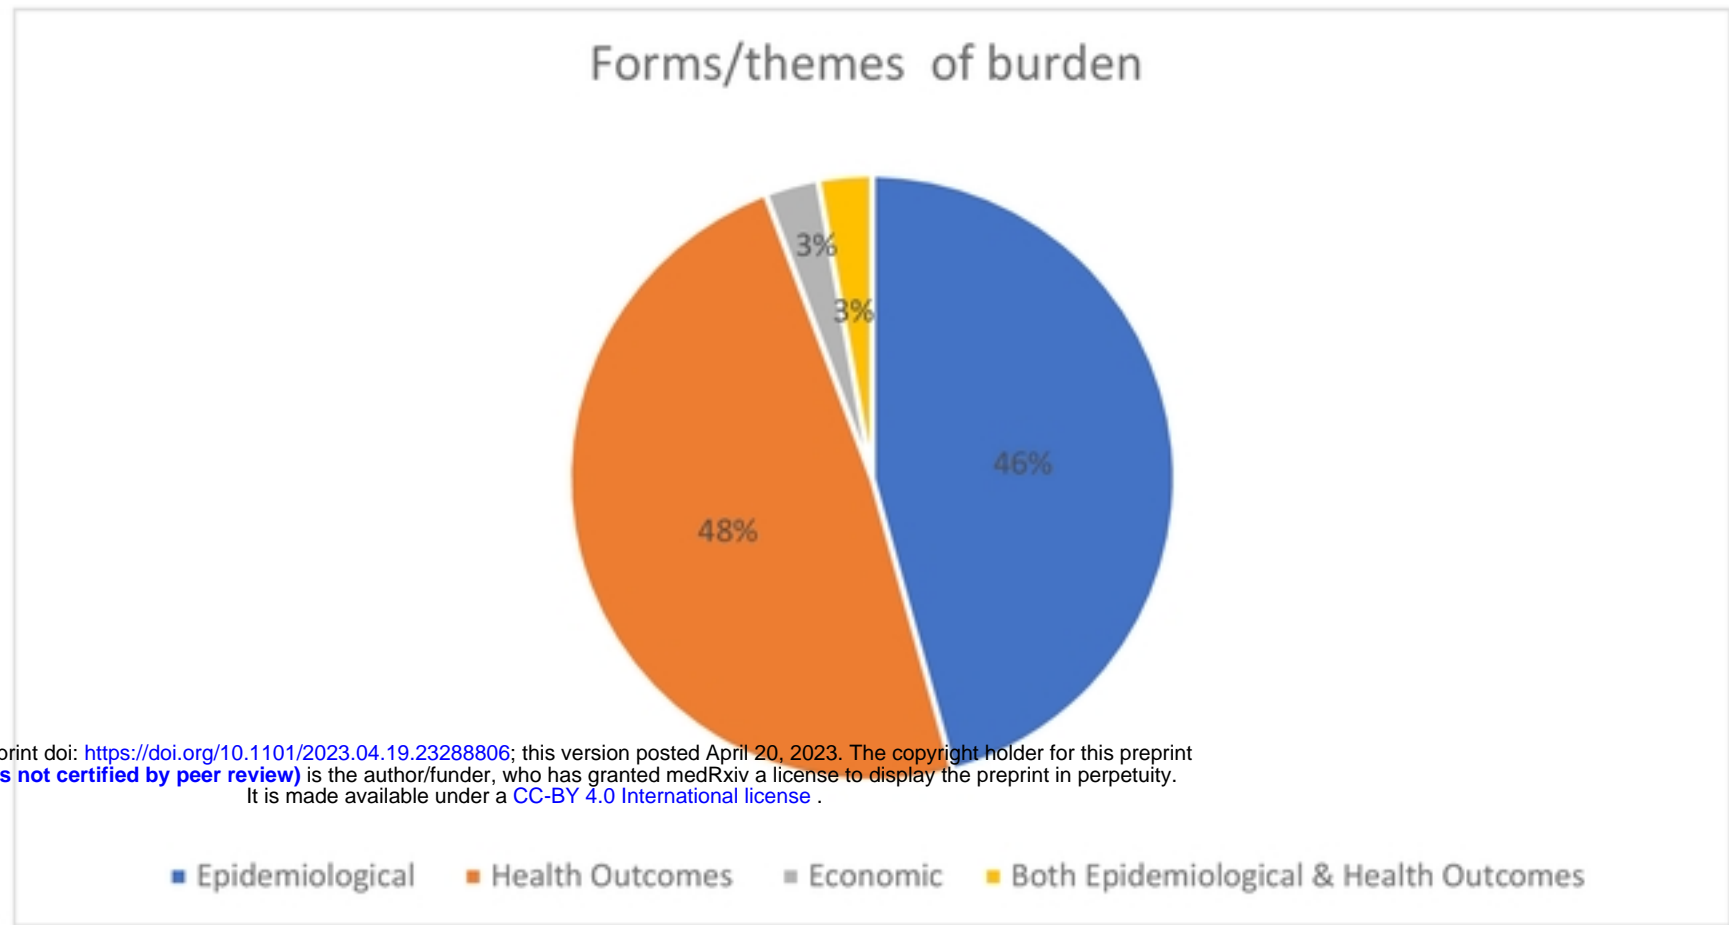

**Figure 1: Frequency of burden of disease themes reported by region**

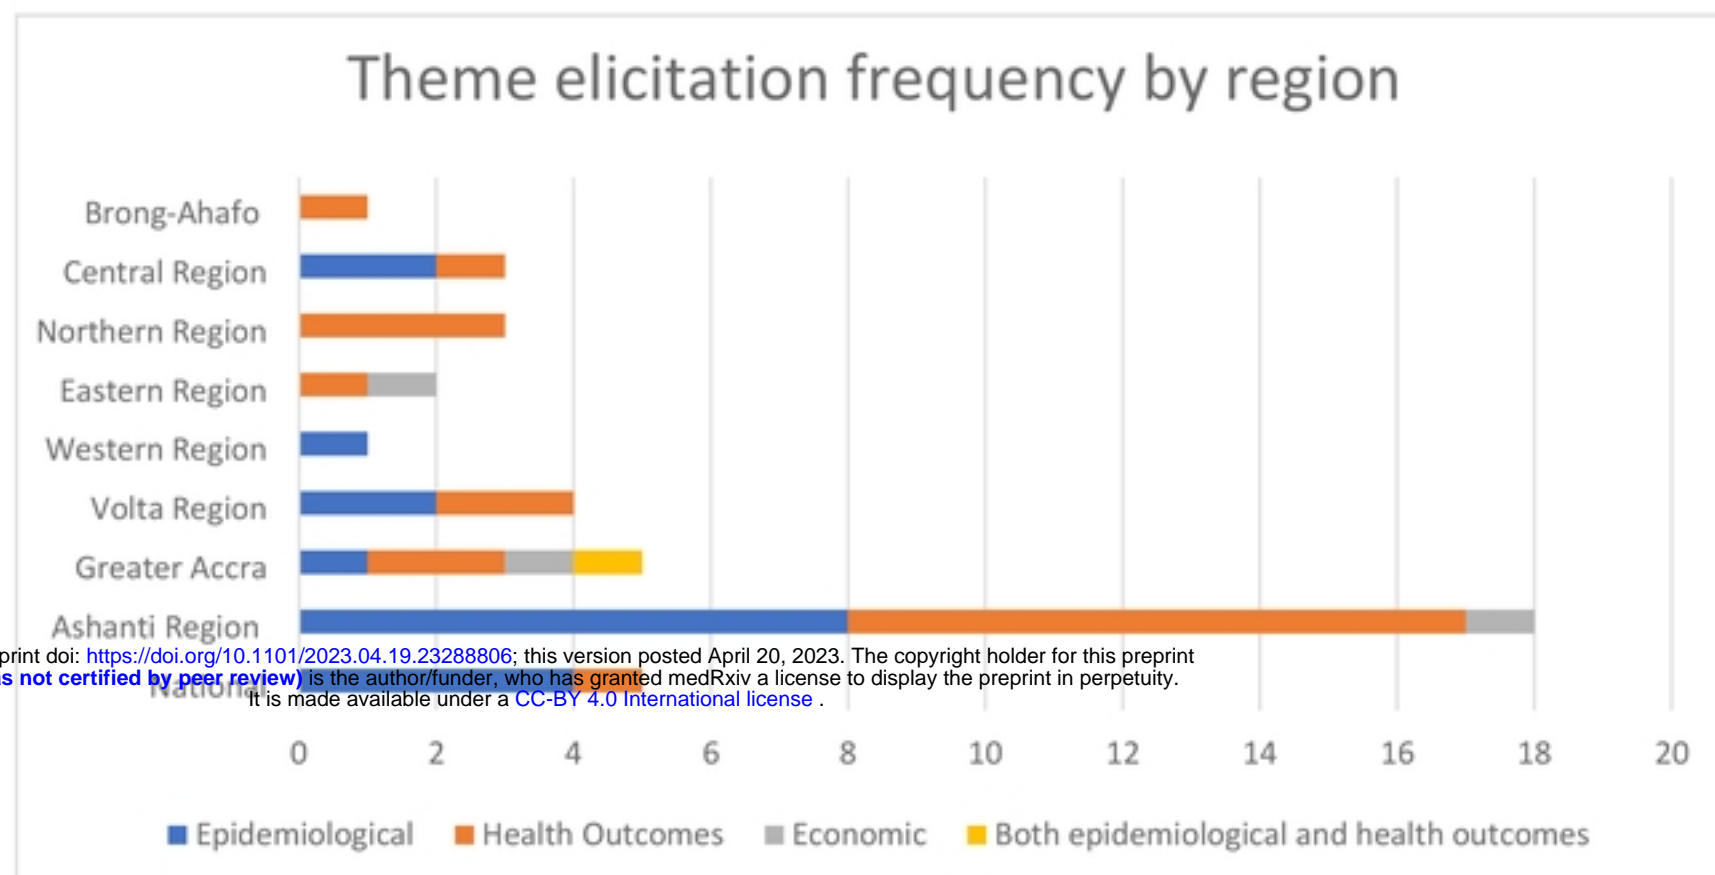

medRxiv preprint doi: <https://doi.org/10.1101/2023.04.19.23288806>; this version posted April 20, 2023. The copyright holder for this preprint (which was not certified by peer review) is the author/funder, who has granted medRxiv a license to display the preprint in perpetuity. It is made available under a [CC-BY 4.0 International license](https://creativecommons.org/licenses/by/4.0/).

**Figure 1: Number of studies per region by complication type**

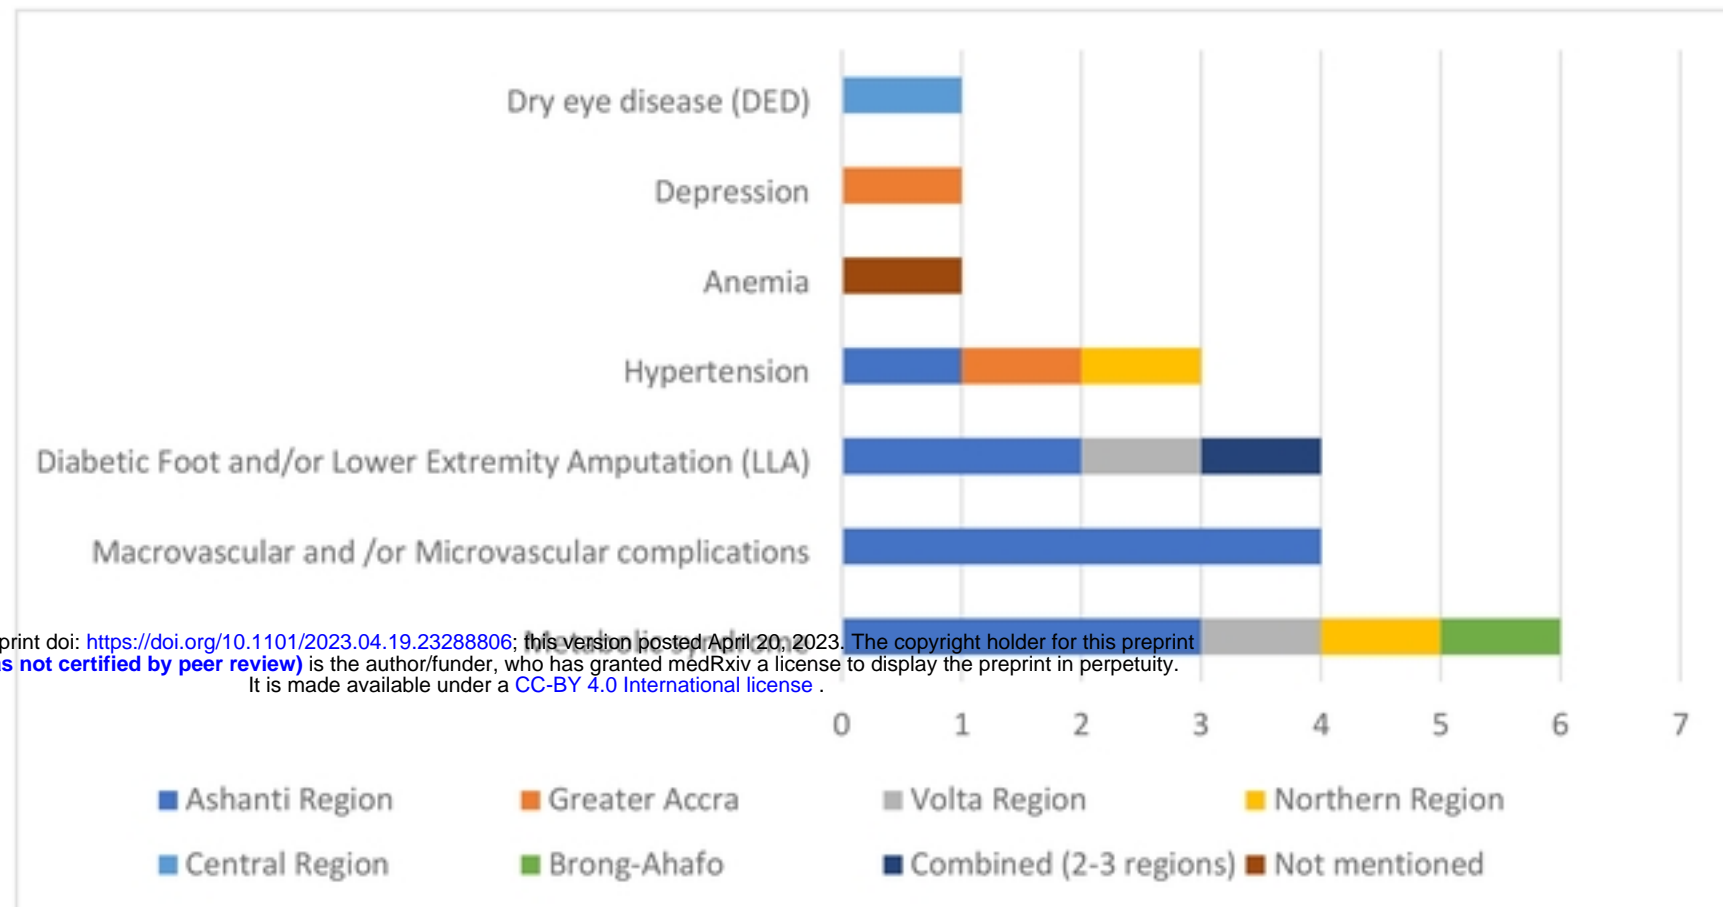

Source: https://medrxiv.org/content/10.1101/2023.04.19.23288806v1.full.pdf
